# Supplementary material for: The impact of changes in LH levels in flexible antagonist protocols on the clinical outcomes of fresh IVF/ICSI cycles in populations of POSEIDON groups 1 and 2: a retrospective cohort study
Source: PeerJ. 2025 Aug 11;13:e19857. doi: 10.7717/peerj.19857 (PMC12352416; doi:10.7717/peerj.19857)
Supplement: Supplemental Information 1 [file peerj-13-19857-s001.xls]

## Sheet: data
No.	LHLH group	Age	BMI	Duration of fertility	Sterility type	Treatment plan	Time to antagonist addition	Total Gn	Gn days	Baseline FSH	Baseline LH	AMH	LH on the trigger day	E2 on the trigger day	Prog on the trigger day	Endometrial thickness on the Trigger day	Number of retrieved eggs	Number of mature eggs	Retrieved eggs rate	Number of double pronuclear fertilizations	Fertilization rate	Number of cleavage	Cleavage rate	Number of excellent embryos	Excellent embryos rate	Number of blastocysts	Blastocyst formation rate	Clinical pregnancy	Live birth
21	G	38	22.43	4	Secondary infertility	ICSI	6	1500	10	6.53	4.6	4.82	0.5	1181	0.2	11	8	#REF!	100	8	100	7	87.5	6	0.857143	4	0.8
22	G	27	19.91	1	Primary infertility	ICSI	10	1350	9	8.42	5.8	6.95	0.8	983	0.3	8	6	#REF!	100	1	16.7	1	100	0	0	0	0
29	G	24	19.03	5	Primary infertility	IVF	10	2475	11	11.62	3.9	4.02	1.6	1779	1	9	3	#REF!	60	3	100	3	100	0	0	0	0.333333
32	G	27	22.23	1	Primary infertility	ICSI	6	2400	11	6.85	3.8	2.29	0.8	1698	0.5	10.7	8	#REF!	88.9	7	87.5	5	71.4	4	0.8	2	0	Yes	Yes
35	G	32	21.23	2	Secondary infertility	IVF	5	2250	13	4.22	4.7	1.69	1.4	2394	0.8	10.3	7	#REF!	100	7	100	6	85.7	3	0.5	0	0.6
36	G	31	18.91	5	Primary infertility	IVF	7	1950	11	6	3.6	7.03	1.2	1842	0.9	11.7	6	#REF!	100	3	50	3	100	3	1	1	0.5
42	G	25	22.86	5	Secondary infertility	ICSI	6	2550	14	6.87	4.3	7.65	0.7	3737	0.7	10.5	7	#REF!	100	6	85.7	5	83.3	4	0.8	1	0
50	G	33	18.26	12	Primary infertility	ICSI	7	2025	11	5.92	3.4	1.2	1.1	1541	0.5	11	6	#REF!	100	5	83.3	5	100	1	0.2	0	1	Yes	Yes
53	G	30	18.73	4	Primary infertility	ICSI	7	2400	11	4.37	4.9	3.72	1.5	4863	1.2	11.6	8	#REF!	88.9	7	87.5	7	100	4	0.571429	2	0.666667	Yes	Yes
68	G	28	24.98	1	Secondary infertility	IVF	7	2700	12	3.96	3.9	1.84	1.4	3429	1.4	11.1	5	#REF!	55.6	3	60	2	66.7	2	1	0	0.333333
69	G	40	22.72	3	Secondary infertility	IVF	5	2700	11	12.86	6.6	2.05	2	2494	0.3	10	7	#REF!	100	7	100	7	100	5	0.714286	3	0.6
71	F	25	23.44	1	Primary infertility	IVF	7	1650	8	7.69	5.1	2.96	3	657	0.5	10.6	2	#REF!	100	2	100	2	100	1	0.5	0	0	Yes	Yes
73	E	30	21.48	3	Primary infertility	ICSI	7	2475	11	5.87	4.5	2.92	4.4	1963	0.5	11.5	5	#REF!	100	5	100	5	100	4	0.8	3	0	Yes	Yes
74	G	32	21.51	4	Primary infertility	IVF	5	2325	11	8.52	4.9	1.3	2.4	3284	0.9	11.7	8	#REF!	88.9	8	100	8	100	6	0.75	0	0
83	G	40	23.63	4	Secondary infertility	IVF	7	3150	13	5.29	3.9	4.84	1.2	4326	0.8	7.6	9	#REF!	100	9	100	8	88.9	2	0.25	1	1
94	D	37	20.66	8	Secondary infertility	ICSI	7	2250	10	6.39	3.4	1.94	3.6	1072	0.5	11.9	3	#REF!	100	3	100	1	33.3	1	1	0	1
96	G	30	17.26	4	Primary infertility	IVF	8	1500	10	5.15	5.6	9.25	0.9	1943	0.3	11.3	5	#REF!	55.6	4	80	4	100	3	0.75	1	0
104	G	36	26.67	10	Secondary infertility	IVF	7	3300	13	6.7	3.6	4.83	0.9	3175	1.1	9	5	#REF!	71.4	5	100	5	100	5	1	3	0	Yes
108	E	35	24.97	2	Secondary infertility	IVF	8	3000	12	8.36	5	3.21	4.4	2032	1.2	11	6	#REF!	75	5	83.3	5	100	5	1	2	0
109	F	40	23.63	3	Secondary infertility	IVF	7	2625	11	6.82	3.6	1.98	1.8	2144	0.5	10.9	5	#REF!	83.3	5	100	5	100	5	1	1	1
112	G	29	21.05	2	Primary infertility	ICSI	8	2025	9	3.96	2.1	1.49	0.9	1671	0.6	9.4	8	#REF!	100	6	75	6	100	5	0.833333	3	0	Yes	Yes
118	F	32	20.83	6	Secondary infertility	IVF	8	1800	8	7.08	2.9	1.86	1.6	1675	0.5	11	9	#REF!	100	7	77.8	7	100	7	1	3	0	Yes	Yes
121	G	41	20.13	1	Secondary infertility	IVF	9	2250	10	7.46	5.6	3.68	0.7	2063	0.5	11	5	#REF!	100	5	100	5	100	1	0.2	0	0.75
131	G	31	23.07	5	Primary infertility	ICSI	4	2250	10	8.39	3.7	4.63	1.5	1732	2.5	11	7	#REF!	100	6	85.7	6	100	4	0.666667	0	1
139	G	24	19.9	5	Primary infertility	IVF	6	2475	11	10.65	2.9	4.02	0.8	1221	0.8	9.4	8	#REF!	88.9	7	87.5	5	71.4	1	0.2	0	0.166667	Yes	Yes
147	G	42	22.27	3	Secondary infertility	IVF	8	3600	12	5.43	1.9	3	0.9	2863	1.7	6.5	5	#REF!	71.4	4	80	4	100	3	0.75	0	1
148	F	28	29.72	5	Primary infertility	IVF	6	2250	9	8.13	1.6	3.44	0.8	308	0.3	9	2	#REF!	100	2	100	2	100	0	0	0	1
153	E	40	21.64	7	Secondary infertility	ICSI	4	2400	10	6.84	2.9	1.86	2.6	1855	0.8	14	6	#REF!	100	5	83.3	4	80	0	0	0	0	Yes
160	G	34	17.9	8	Secondary infertility	IVF	5	2400	11	7.17	3.2	3.28	0.8	2744	0.9	7.2	7	#REF!	87.5	6	85.7	6	100	3	0.5	2	0
164	G	39	18.67	1	Primary infertility	ICSI	7	2625	12	10.26	4.3	2.73	0.6	3229	1.4	7.9	7	#REF!	87.5	6	85.7	6	100	6	1	2	1
167	G	34	20.4	3	Secondary infertility	IVF	7	2400	11	7.11	2.2	3.56	0.9	1734	0.5	13	4	#REF!	80	4	100	4	100	3	0.75	1	0.333333
172	G	29	20.31	3	Secondary infertility	ICSI	10	1575	11	11.71	5.7	1.85	1.2	2446	0.9	9	6	#REF!	85.7	4	66.7	4	100	2	0.5	0	0	Yes	Yes
173	G	39	22.76	8	Secondary infertility	IVF	5	2625	12	6.4	3.1	1.97	0.8	2456	0.5	8.4	3	#REF!	75	3	100	3	100	0	0	0	0
181	G	39	20.51	5	Primary infertility	IVF	6	2775	10	8.15	3.7	1.98	0.5	1310	1	12.8	5	#REF!	83.3	3	60	3	100	2	0.666667	0	0
183	G	32	24.14	2	Primary infertility	ICSI	5	2250	10	8.32	5.1	3.42	1.5	3424	2.1	12.5	4	#REF!	100	4	100	4	100	1	0.25	0	0.5
184	F	31	18.61	2	Secondary infertility	IVF	7	2700	12	10.57	5.6	1.26	2.8	1528	0.6	8.8	4	#REF!	100	4	100	4	100	3	0.75	0	1
189	F	41	20.2	5	Secondary infertility	IVF	9	2175	10	5.24	4.2	2.21	2.2	2965	2.5	10.7	5	#REF!	71.4	4	80	4	100	2	0.5	1	0
191	G	38	19.27	5	Secondary infertility	ICSI	8	2475	11	10.33	3.6	1.54	1.2	1089	0.4	13	3	#REF!	100	0	0	0	0	0	0	0	0
200	B	42	22.94	1	Secondary infertility	IVF	5	1725	7	9.38	5.7	1.37	9.1	1003	0.6	12.5	2	#REF!	66.7	2	100	1	50	0	0	0	1
207	F	39	22.04	2	Secondary infertility	IVF	4	3150	11	6.6	3.1	3	1.7	3476	2.2	10	9	#REF!	90	8	88.9	8	100	6	0.75	3	0
208	C	37	22.83	5	Secondary infertility	IVF	8	1575	7	7.15	2.8	2.67	3.5	1004	1	9.7	5	#REF!	100	4	80	3	75	2	0.666667	1	0
221	F	39	21.09	5	Secondary infertility	ICSI	6	2250	10	12.2	2.3	3.15	1.6	2095	0.4	13	9	#REF!	100	8	88.9	8	100	6	0.75	1	1
242	G	33	16.89	8	Primary infertility	IVF	7	1725	11	7.14	2.4	4.74	0.7	1797	0.5	9.3	6	#REF!	85.7	1	16.7	1	100	0	0	0	1
246	G	38	20.83	4	Secondary infertility	IVF	8	3000	12	9.02	4.9	2.66	1.1	1751.9	1.77	9.6	6	#REF!	100	6	100	6	100	3	0.5	1	0
247	E	36	24.65	9	Primary infertility	IVF	7	2700	9	6	2.3	1.38	1.8	837	0.3	7.4	2	#REF!	50	2	100	2	100	2	1	0	0
249	F	28	24.03	1	Secondary infertility	IVF	8	2850	11	5.84	1.6	2.07	0.8	724	0.6	12	5	#REF!	100	4	80	4	100	3	0.75	1	0.666667
389	B	46	22.03	2	Secondary infertility	IVF	5	1350	6	7.59	4.4	1.34	7.5	628	0.4	8.1	1	#REF!	50	1	100	1	100	0	0	0	0
265	G	32	17.72	3	Secondary infertility	IVF	5	2325	8	10.45	5.1	1.74	1.5	943	0.2	10	1	#REF!	50	1	100	1	100	1	1	0	0
267	G	33	20.83	1	Secondary infertility	IVF	5	3000	11	9.47	2.8	1.85	0.7	622	0.3	11	3	#REF!	100	3	100	3	100	2	0.666667	1	1
278	G	32	19.95	2	Primary infertility	IVF	6	3525	13	9.5	3.3	2.99	0.1	2711	1.9	8	9	#REF!	81.8	7	77.8	6	85.7	5	0.833333	0	0
304	G	38	24.46	5	Secondary infertility	IVF	5	1950	10	5.54	3.5	7.63	0.4	2887	0.4	10	7	#REF!	63.6	7	100	6	85.7	3	0.5	1	1	Yes
305	G	35	22.48	7	Secondary infertility	IVF	6	4800	13	4.54	6.1	4.3	1.2	2939	0.4	13	4	#REF!	80	4	100	4	100	2	0.5	0	0.333333
325	E	41	21.45	2	Secondary infertility	IVF	5	2550	9	10.73	2.4	2.17	2.2	905	0.3	11.6	1	#REF!	50	1	100	1	100	1	1	0	0
333	G	38	21.48	3	Primary infertility	IVF	5	2250	10	6.27	1.9	2.63	0.3	1166	1.6	11	7	#REF!	87.5	7	100	7	100	3	0.428571	2	0
335	G	27	22.43	5	Primary infertility	IVF	5	1350	9	6.75	4.6	4.16	0.8	1645	0.5	12.5	7	#REF!	100	6	85.7	6	100	5	0.833333	3	0	Yes	Yes
339	G	35	21.64	2	Primary infertility	ICSI	5	1500	10	9.74	6.2	3.63	1.8	2046	0.4	12	9	#REF!	90	9	100	9	100	6	0.666667	3	1
344	D	29	23.4	1	Primary infertility	IVF	5	2475	11	6.28	1	4.69	1	2770	1	10.5	9	#REF!	100	7	77.8	7	100	4	0.571429	1	0.666667
349	E	38	18.66	5	Secondary infertility	ICSI	7	2400	11	12.28	4.4	1.54	3.5	927	0.7	14	6	#REF!	100	4	66.7	4	100	3	0.75	0	0.666667
350	G	32	18.61	1	Secondary infertility	IVF	5	1800	8	6.87	4.1	1.26	0.8	813	0.4	10.4	7	#REF!	100	6	85.7	5	83.3	4	0.8	1	0
366	G	37	20.81	5	Primary infertility	IVF	7	2550	11	12.08	6.7	1.76	0.4	1958	0.8	11.7	7	#REF!	100	7	100	7	100	4	0.571429	4	0
368	G	35	21.36	3	Secondary infertility	IVF	7	2325	11	14.13	2.8	1.72	1.1	794	0.4	9.9	3	#REF!	100	3	100	3	100	2	0.666667	2	0	Yes
375	F	31	24.61	3	Primary infertility	IVF	5	2625	12	6.42	2.8	2.03	2	2565	1	15	6	#REF!	100	6	100	6	100	2	0.333333	0	0
376	G	24	24.12	3	Secondary infertility	ICSI	5	2025	9	6.09	2.4	4.64	1.1	3082	1.1	14.5	4	#REF!	66.7	2	50	2	100	0	0	0	0.5
377	G	41	24.24	1	Secondary infertility	ICSI	7	2475	11	8.33	3.7	3.13	1.3	3312	1.4	10.6	8	#REF!	80	3	37.5	3	100	2	0.666667	0	0.5
379	G	28	19.23	4	Primary infertility	IVF	8	1012.5	9	6.11	4.9	6.05	1.6	3785	0.6	12	8	#REF!	80	6	75	5	83.3	5	1	2	0
380	E	39	21.48	3	Secondary infertility	IVF	5	2025	9	8.18	3.9	3.25	3.6	1935	0.7	12	9	#REF!	100	7	77.8	7	100	2	0.285714	1	0
383	G	36	20.5	9	Secondary infertility	ICSI	7	1350	9	8.31	3.8	2.96	1.2	2693	0.9	14	7	#REF!	100	7	100	7	100	0	0	0	0
390	G	40	24.22	8	Secondary infertility	IVF	5	3075	11	6.71	5.9	2.24	1.2	2022	0.6	14	6	#REF!	75	5	83.3	5	100	3	0.6	0	0.5
393	G	32	22.89	5	Primary infertility	IVF	5	1500	10	8.17	3.5	1.4	0.46	979	0.5	11	8	#REF!	80	7	87.5	6	85.7	4	0.666667	2	0	Yes	Yes
394	G	30	27.34	5	Secondary infertility	IVF	8	2625	12	7.22	4.6	3.58	2.1	3870	1	15	8	#REF!	80	6	75	4	66.7	3	0.75	1	0
405	G	35	17.69	5	Primary infertility	IVF	6	2025	9	6.25	4.3	1.76	0.9	2026	0.5	11	5	#REF!	83.3	5	100	5	100	4	0.8	2	0	Yes	Yes
414	G	31	20.2	2	Primary infertility	ICSI	6	1425	11	5.73	4	11.5	1.1	2937	0.8	13.6	9	#REF!	75	8	88.9	8	100	4	0.5	0	0.5
418	G	31	18.26	6	Secondary infertility	IVF	7	2250	10	7.01	3.4	4.21	1.5	2590	0.7	10.4	8	#REF!	100	8	100	8	100	2	0.25	1	0.5
419	G	31	20.03	3	Primary infertility	ICSI	9	3150	14	6.12	2.2	1.63	0.7	1228	0.6	13.8	6	#REF!	85.7	4	66.7	3	75	2	0.666667	0	0
424	G	30	18.1	2	Secondary infertility	IVF	7	2700	12	10.93	3.8	1.21	0.6	2560	0.9	12	6	#REF!	100	6	100	6	100	5	0.833333	0	0.8	Yes	Yes
429	G	42	20.55	11	Secondary infertility	IVF	5	2250	10	9.36	3.3	2.54	0.9	1024	0.3	9.3	4	#REF!	57.1	4	100	4	100	2	0.5	0	0.833333
435	E	37	20.78	2	Secondary infertility	IVF	9	2550	12	8.39	2.4	1.7	2.3	2332	0.7	9.3	7	#REF!	100	7	100	7	100	5	0.714286	2	0.5
442	F	38	23.88	2	Secondary infertility	ICSI	7	2100	9	5	2.7	1.38	1.4	1003	1.3	12	4	#REF!	100	4	100	4	100	3	0.75	0	0
444	G	43	18.75	3	Secondary infertility	IVF	7	1425	7	10.49	4.7	1.7	1.4	338	0.3	5.9	1	#REF!	100	1	100	1	100	1	1	0	0
450	G	35	19.48	5	Secondary infertility	IVF	8	2925	9	8.5	3.9	2.09	1.1	1900	1	8.4	5	#REF!	71.4	3	60	3	100	3	1	1	0
457	D	39	19.38	4	Secondary infertility	IVF	6	2025	9	9.19	3.8	1.27	3.9	2040	1	8.7	2	#REF!	33.3	2	100	2	100	1	0.5	0	0	Yes	Yes
468	F	37	24.22	3	Secondary infertility	ICSI	8	2400	9	7.56	3	1.98	1.8	1129	0.5	8.8	8	#REF!	100	6	75	6	100	4	0.666667	3	0
471	F	28	24.97	1	Secondary infertility	IVF	7	2850	11	5.48	2.4	2.78	1.3	3733	1.4	10	5	#REF!	83.3	5	100	5	100	4	0.8	1	0
480	G	38	17.94	3	Secondary infertility	ICSI	7	1950	9	6.38	4.2	2.93	1.5	3856	1.3	11	6	#REF!	100	3	50	3	100	2	0.666667	0	0
482	G	40	19.48	4	Secondary infertility	IVF	7	2100	7	6.02	3	1.3	1.2	666	0.3	7.4	1	#REF!	100	1	100	1	100	1	1	0	0
490	G	31	21.76	2	Primary infertility	IVF	5	2475	9	7.22	3.4	2.63	1.5	1398	0.7	8.1	4	#REF!	80	4	100	4	100	1	0.25	0	0
495	G	33	23.56	1	Secondary infertility	IVF	6	2775	10	6.77	4.7	2.31	0.8	2181	1.4	12.8	3	#REF!	75	1	33.3	0	0	0	0	0	1
510	G	26	22.89	6	Secondary infertility	IVF	11	2475	9	10.47	3.9	1.97	1.7	908	0.4	8.2	3	#REF!	100	3	100	3	100	0	0	2	1
519	G	32	23.31	2	Primary infertility	ICSI	7	2625	12	6.04	4.2	6.24	0.2	3930	2.2	12	2	#REF!	28.6	2	100	2	100	1	0.5	0	0.428571
520	G	36	19.11	2	Secondary infertility	IVF	6	3075	13	7.33	3.6	1.61	0.9	3980	2.3	9.7	6	#REF!	66.7	6	100	6	100	4	0.666667	2	0.5
525	F	36	26.35	7	Primary infertility	IVF	7	3600	11	5.74	2.8	2.36	1.6	2254	1.5	9.3	7	#REF!	77.8	7	100	6	85.7	6	1	4	0
543	B	39	21.72	2	Secondary infertility	IVF	10	2850	10	9.89	3.2	1.56	4.8	2241	0.6	8.6	5	#REF!	100	4	80	4	100	4	1	2	1
547	F	37	23.42	2	Secondary infertility	ICSI	8	1725	8	7.59	1.6	1.56	0.9	524	0.5	14.5	2	#REF!	50	1	50	1	100	0	0	0	0.666667
549	G	34	21.41	3	Secondary infertility	IVF	5	2025	9	6.4	3	1.72	1.2	1391	0.8	10.2	4	#REF!	80	4	100	4	100	1	0.25	0	0	Yes
550	G	27	18.99	3	Secondary infertility	IVF	5	2625	12	5.57	2.5	1.21	0.2	2199	1.3	9.2	6	#REF!	60	5	83.3	5	100	3	0.6	0	1
554	G	32	21.5	10	Secondary infertility	IVF	8	2025	8	12.5	4.6	1.2	1.5	927	0.4	9	3	#REF!	100	3	100	3	100	3	1	0	1
555	G	38	23.81	1	Secondary infertility	IVF	8	2475	10	5.48	4.8	1.48	2.3	2414	1.2	10	5	#REF!	62.5	5	100	5	100	3	0.6	1	0.5
557	G	29	17.65	6	Secondary infertility	IVF	7	3075	12	9.13	3.1	4.84	0.9	2576	0.8	9	7	#REF!	77.8	7	100	7	100	2	0.285714	1	0.5
560	E	40	19.49	1	Secondary infertility	IVF	11	3150	12	3.83	1.6	1.22	1.2	1226	0.3	13	4	#REF!	66.7	4	100	4	100	4	1	0	0	Yes
564	A	39	21.09	7	Secondary infertility	IVF	6	1500	7	5.17	2.2	2.77	4.6	530	0.3	10	3	#REF!	100	3	100	2	66.7	2	1	0	0.333333
565	G	34	21.78	8	Secondary infertility	ICSI	7	3525	11	6.24	3.1	2.39	0.1	2957	1.6	11	8	#REF!	100	2	25	2	100	0	0	0	0.5
567	G	29	22.03	5	Primary infertility	IVF	12	1800	8	4.32	4.7	3.36	0.8	1276	0.7	10	7	#REF!	100	3	42.9	1	33.3	0	0	0	0.25
569	G	35	23.33	4	Secondary infertility	IVF	7	2850	11	5.45	2.7	1.5	0.9	2955	1.3	10	7	#REF!	100	7	100	7	100	3	0.428571	2	0
570	G	28	29.73	2	Primary infertility	IVF	7	1650	9	5.46	2	9.16	0.6	1400	0.2	14	3	#REF!	75	2	66.7	2	100	2	1	0	1
578	F	42	22.94	1	Secondary infertility	IVF	7	2625	9	9.71	6.2	1.37	3.6	1217	0.3	11	3	#REF!	100	3	100	3	100	3	1	0	0
582	F	26	19.53	1	Primary infertility	ICSI	5	1350	9	6.09	2.8	1.44	1.4	1425	0.4	10	7	#REF!	100	7	100	6	85.7	2	0.333333	0	0.5
586	F	28	19.07	4	Primary infertility	ICSI	6	2325	10	3.95	1.6	3.36	1.1	4456	1.3	11	6	#REF!	75	2	33.3	2	100	0	0	0	0
589	G	30	19.29	3	Primary infertility	IVF	6	1875	11	5.22	7.7	8.08	3.1	3676	0.6	8	6	#REF!	100	5	83.3	5	100	4	0.8	1	1
591	G	38	21.48	13	Secondary infertility	ICSI	7	3225	12	5.82	2.9	2.32	0.8	4093	0.4	10	8	#REF!	100	8	100	8	100	1	0.125	0	0	Yes
592	A	29	23.24	3	Secondary infertility	IVF	8	2925	11	3.88	1	1.87	2.1	739	0.4	12	3	#REF!	100	2	66.7	2	100	0	0	0	0.6
594	G	33	18.75	5	Primary infertility	IVF	6	1275	9	5.16	2.5	5.46	0.2	1097	1.5	10	8	#REF!	88.9	6	75	6	100	1	0.166667	0	0.333333
595	G	34	20.2	5	Primary infertility	IVF	6	2700	9	8.8	4.4	2.25	0.8	2790	1.5	9	4	#REF!	100	4	100	4	100	0	0	1	1
603	G	39	24.77	3	Secondary infertility	IVF	6	2325	11	8.06	4	1.72	1	1162	0.4	14	7	#REF!	77.8	7	100	7	100	1	0.142857	1	0
607	G	27	17.94	1	Secondary infertility	IVF	7	1800	11	5.69	3.3	4.47	0.2	980	2	11	8	#REF!	100	8	100	8	100	6	0.75	2	0
609	D	34	22.63	1	Secondary infertility	IVF	6	3525	12	6.1	1.3	1.76	1.6	1757	0.4	7	3	#REF!	75	3	100	3	100	2	0.666667	0	0.5
612	G	38	17.26	2	Secondary infertility	IVF	6	1875	9	7.15	3.3	3.69	0.7	1934	0.7	9	7	#REF!	87.5	7	100	7	100	5	0.714286	4	0
618	E	33	25	7	Primary infertility	ICSI	6	3300	11	3.26	1.4	3.01	1.2	1469	1	11	5	#REF!	71.4	2	40	2	100	0	0	0	0
621	G	37	23.44	1	Secondary infertility	ICSI	8	2250	10	5.67	4	4.29	1.3	2497	0.9	10.5	9	#REF!	100	8	88.9	8	100	7	0.875	5	0.333333
625	G	26	24.24	3	Primary infertility	ICSI	8	2250	10	8.07	4.2	1.7	0.6	929	0.3	8.2	5	#REF!	100	5	100	4	80	2	0.5	1	1
631	F	28	20.81	6	Primary infertility	IVF	8	1425	10	7.83	2.2	1.34	1.1	551	0.5	13	1	#REF!	50	0	0	0	0	0	0	0	0
634	E	36	21.77	5	Secondary infertility	IVF	7	2925	12	4.63	1.3	2.07	1	1807	0.7	10.7	6	#REF!	100	4	66.7	4	100	3	0.75	1	0	Yes
637	A	38	21.36	1	Secondary infertility	IVF	7	2550	9	7.69	3.3	1.28	8.8	632	0.3	13	1	#REF!	50	1	100	1	100	1	1	0	0
645	G	34	18.73	5	Primary infertility	ICSI	5	1575	7	6.69	3.7	3.2	1.5	1135	0.3	6.8	4	#REF!	100	2	50	1	50	0	0	0	0.333333
420	C	38	19.49	15	Primary infertility	IVF	7	2475	11	9.27	3.3	1.58	4.2	1395	0.8	12.5	3	#REF!	60	3	100	3	100	2	0.666667	2	0.5
649	F	31	21.76	2	Primary infertility	IVF	5	1500	10	7.3	4.8	2.63	3	1662	1	11	4	#REF!	100	1	25	1	100	0	0	0	0.25
650	G	25	23.88	5	Primary infertility	IVF	7	1950	9	5.11	3.1	9.72	1.3	2333	0.6	11	9	#REF!	90	4	44.4	2	50	0	0	0	0
651	G	40	19.43	4	Secondary infertility	IVF	7	1950	9	4.86	3.6	1.75	1	1624	1	5	4	#REF!	100	3	75	2	66.7	0	0	0	0.833333
73	F	34	22.94	1	Secondary infertility	IVF	8	2700	10	8.8	3.7	3.82	1.9	636	0.4	10.9	3	#REF!	75	2	66.7	2	100	1	0.5	0	0.666667	Yes	Yes
660	G	28	20.03	3	Primary infertility	ICSI	7	1725	8	9.42	5.4	4.78	0.6	3035	0.8	7.5	4	#REF!	57.1	2	50	2	100	2	1	0	0.666667
772	G	28	22.19	3	Secondary infertility	IVF	8	2475	11	7.79	3.1	3.23	0.9	2122	0.4	13.3	3	#REF!	100	3	100	3	100	2	0.666667	0	0	Yes	Yes
675	G	33	21.48	4	Primary infertility	ICSI	6	1725	11	5.44	2.7	3.27	0.8	1790	0.7	20	6	#REF!	66.7	4	66.7	3	75	2	0.666667	0	0
87	D	35	19.76	2	Secondary infertility	IVF	5	2550	11	12.36	3.4	1.87	3.9	2531	0.5	12	3	#REF!	60	2	66.7	1	50	1	1	0	1	Yes
681	F	31	23.14	9	Secondary infertility	ICSI	7	3075	10	10.14	3.4	2	2.3	553	0.4	11	2	#REF!	66.7	1	50	0	0	0	0	0	1
320	G	34	24.88	0	Secondary infertility	IVF	6	2000	10	11.77	4.5	1.24	1.5	961	0.2	9.7	3	#REF!	100	3	100	3	100	2	0.666667	0	0	Yes	Yes
694	G	28	21.4	7	Primary infertility	IVF	6	1500	10	5.27	3	2.84	0.9	1132	0.4	11.5	6	#REF!	100	6	100	5	83.3	4	0.8	2	0
237	G	32	21.64	1	Secondary infertility	IVF	6	2700	12	6.75	3.8	2.19	0.6	2234	1.2	9.8	4	#REF!	40	4	100	4	100	1	0.25	0	0
302	G	40	21.41	5	Secondary infertility	IVF	5	1950	9	9.61	3.4	3.4	0.9	1516	0.3	11	4	#REF!	100	4	100	4	100	2	0.5	0	0	Yes
42	F	26	21.33	2	Primary infertility	IVF	8	2025	10	7.44	2.5	2.43	1.7	1212	0.4	11.5	8	#REF!	100	5	62.5	5	100	0	0	0	0
428	G	41	25.71	2	Secondary infertility	ICSI	8	2625	9	8.12	7	2.07	1.5	1072	0.5	6	4	#REF!	80	3	75	3	100	2	0.666667	1	1
674	G	35	20.31	2	Primary infertility	ICSI	8	1575	11	5.81	7.1	2.44	2	6306	1.4	12.7	4	#REF!	33.3	3	75	3	100	1	0.333333	0	0
685	G	29	22.21	1	Secondary infertility	IVF	5	2175	12	6.37	2.9	3.87	0.4	1601	0.8	12	4	#REF!	100	4	100	4	100	2	0.5	1	0.5	Yes
61	F	40	21.97	7	Secondary infertility	IVF	5	2400	11	4.76	4.2	1.78	2.5	4683	1.4	11.2	9	#REF!	81.8	9	100	9	100	7	0.777778	3	0
49	F	42	25.71	2	Secondary infertility	ICSI	6	3675	11	7.25	5	2.07	2.8	2949	0.9	9.2	4	#REF!	57.1	4	100	4	100	4	1	1	1
348	E	30	28.13	7	Primary infertility	ICSI	9	3150	12	4.93	2	1.45	1.5	1047	0.4	14.5	4	#REF!	57.1	4	100	3	75	2	0.666667	0	0
509	G	41	19.56	5	Secondary infertility	IVF	9	2700	11	8.04	3.3	1.34	0.9	3269	1.1	16	4	#REF!	100	3	75	3	100	3	1	0	1
85	F	34	26.57	1	Secondary infertility	ICSI	8	2700	9	5.91	3.4	2.08	2.2	1994	1.5	11	6	#REF!	75	4	66.7	4	100	4	1	3	1
87	D	32	26.57	1	Primary infertility	IVF	8	2025	9	4.72	1.9	3.47	2.3	684	0.3	13.3	4	#REF!	80	3	75	2	66.7	0	0	0	0.666667
90	F	27	23.23	3	Primary infertility	IVF	5	2400	10	8.16	1.5	1.85	0.8	1201	0.9	7.8	6	#REF!	85.7	6	100	4	66.7	4	1	1	1
96	G	32	17.69	1	Secondary infertility	IVF	6	1575	11	7.9	3.5	5.61	0.8	2322	1	12	8	#REF!	80	7	87.5	7	100	5	0.714286	2	0	Yes	Yes
99	E	38	27.77	12	Secondary infertility	IVF	6	2100	7	5.16	1.3	1.25	1.1	721	0.4	9.6	3	#REF!	60	3	100	2	66.7	0	0	0	1
101	C	34	19.81	2	Primary infertility	IVF	6	2250	10	7.96	2.7	1.35	4	1420	0.9	12	3	#REF!	75	2	66.7	2	100	0	0	0	0
104	F	26	18.36	6	Primary infertility	IVF	5	2200	11	12.74	2.4	2.69	1.7	3175	1	10.9	7	#REF!	100	4	57.1	4	100	1	0.25	0	0.333333
106	F	40	20.03	9	Secondary infertility	ICSI	7	2175	10	8.37	3	2	2	1479	0.5	10	4	#REF!	80	2	50	2	100	1	0.5	1	0
114	G	35	16.65	6	Secondary infertility	IVF	6	2475	11	12.76	4.8	1.6	1.3	1678	0.5	8.6	6	#REF!	100	6	100	6	100	5	0.833333	3	1	Yes	Yes
121	B	36	26.95	9	Primary infertility	IVF	12	3525	12	6.27	3.3	1.72	5.6	1287	0.7	11	3	#REF!	100	3	100	3	100	2	0.666667	0	0	Yes	Yes
130	G	44	21.22	8	Secondary infertility	IVF	6	2550	12	7	3.5	1.53	0.8	2564	1.6	8.2	7	#REF!	87.5	6	85.7	6	100	3	0.5	1	0
142	G	40	24.65	5	Secondary infertility	IVF	6	2250	10	5.27	2.2	2.11	1	2520	0.9	20	9	#REF!	100	9	100	8	88.9	3	0.375	1	0.5
153	A	43	22.94	1	Secondary infertility	IVF	8	2850	10	9.36	5.4	1.37	13.8	704	0.4	12.6	0	#REF!	0	0	0	0	0	0	0	0	0
157	D	41	19.57	2	Secondary infertility	IVF	6	1875	9	6.82	2.3	1.69	2.4	1361	0.7	9.7	8	#REF!	100	8	100	8	100	5	0.625	1	0
158	G	43	24.03	1	Secondary infertility	IVF	5	2175	10	4.49	4.4	1.25	1.5	1089	0.5	12.4	3	#REF!	60	3	100	3	100	3	1	1	0.625
159	E	35	23.73	1	Secondary infertility	IVF	7	2550	11	7.96	3.3	2.31	2.7	1538	0.6	8.8	6	#REF!	85.7	6	100	6	100	4	0.666667	1	1
160	G	36	19.78	7	Secondary infertility	IVF	5	4500	16	6.09	2.3	1.2	0.8	1772	1	13	1	#REF!	20	1	100	1	100	1	1	0	0
165	G	33	20.78	2	Secondary infertility	IVF	9	2025	9	7.57	4.5	1.56	0.8	1339	0.8	11.9	4	#REF!	80	4	100	4	100	3	0.75	1	1	Yes	Yes
181	F	37	21.36	5	Secondary infertility	IVF	6	2175	10	6.37	3.5	3.85	2.4	3684	1.4	11	7	#REF!	77.8	5	71.4	5	100	3	0.6	0	0
188	G	39	24.03	17	Secondary infertility	IVF	5	1800	7	5.84	2.9	2.48	0.5	607	0.5	11.7	8	#REF!	100	8	100	7	87.5	3	0.428571	1	0
193	G	30	18.73	2	Primary infertility	IVF	6	2325	11	9.01	3.3	1.39	1.4	1897	0.8	11.6	7	#REF!	100	7	100	7	100	2	0.285714	1	0
452	F	34	18.37	7	Primary infertility	ICSI	7	2625	11	9.98	4.9	1.66	2.8	933	0.3	12	4	#REF!	100	4	100	4	100	2	0.5	0	1
489	F	34	16.65	7	Primary infertility	ICSI	8	1050	7	4.78	3.2	1.78	2	1298	0.6	10.5	4	#REF!	100	4	100	4	100	3	0.75	2	0
497	G	32	21.52	6	Primary infertility	ICSI	8	1350	9	5.27	1.9	1.23	0.6	574	0.3	10.2	4	#REF!	100	3	100	3	100	1	0.333333	0	0.5
212	G	28	21.79	3	Secondary infertility	IVF	7	1800	9	6.87	5	1.25	1.4	1879	0.9	9	8	#REF!	88.9	8	100	8	100	1	0.125	0	0
216	D	40	22.32	1	Secondary infertility	IVF	6	3450	13	8.65	2.8	1.4	2.8	2020	0.6	15.8	3	#REF!	100	3	100	3	100	2	0.666667	1	0
217	G	34	23.43	5	Secondary infertility	IVF	9	2925	12	6.06	2.1	2.04	0.5	2857	2.7	9.8	9	#REF!	100	8	88.9	8	100	3	0.375	0	0.25
248	F	36	20.03	3	Primary infertility	IVF	7	2700	12	7.93	2.4	2.69	1.4	2725	1	13.3	9	#REF!	100	9	100	9	100	4	0.444444	0	0
265	F	34	25.21	1	Primary infertility	ICSI	5	2100	11	6.26	7.5	5.38	4.3	2032	0.3	7.8	9	#REF!	100	3	33.3	2	66.7	2	1	0	0
270	G	41	21.64	15	Primary infertility	IVF	5	2175	10	7.58	3.1	2.36	0.9	1635	0.4	11	6	#REF!	100	6	100	6	100	5	0.833333	1	0
280	G	31	21.03	3	Primary infertility	ICSI	6	2925	13	7.44	4.5	3.02	1.5	3647	0.3	9	7	#REF!	100	5	71.4	4	80	2	0.5	1	0	Yes	Yes
282	G	42	21.26	2	Secondary infertility	IVF	5	2850	13	6.46	3.5	4.58	1	3305	0.5	12	9	#REF!	100	9	100	9	100	7	0.777778	3	1
283	G	35	19.56	1	Secondary infertility	IVF	5	2925	11	5.54	1.9	1.89	0.5	2093	2.3	9.5	9	#REF!	100	9	100	9	100	7	0.777778	2	1
285	G	28	21.63	2	Secondary infertility	IVF	6	2100	9	5.2	3.1	5.5	1.2	2990	0.7	9.5	9	#REF!	100	9	100	9	100	6	0.666667	4	1
287	D	36	21.87	2	Secondary infertility	IVF	5	2250	10	7.61	3.8	1.35	4.7	1211	0.4	10.7	4	#REF!	100	4	100	2	50	1	0.5	0	0	Yes	Yes
294	B	30	17.48	10	Primary infertility	IVF	7	2100	11	10.64	1.5	1.57	2.8	2766	0.6	10.4	9	#REF!	100	8	88.9	7	87.5	4	0.571429	0	0.666667
301	G	34	27.24	5	Secondary infertility	IVF	6	2025	9	6.82	3.7	1.44	0.7	1852	0.5	14	8	#REF!	100	1	12.5	1	100	0	0	0	0
303	F	29	19.15	7	Primary infertility	IVF	6	2775	11	8.64	3.7	1.2	1.9	1379	0.4	15	3	#REF!	75	3	100	3	100	3	1	0	0
306	G	34	23.81	6	Primary infertility	IVF	5	1800	7	10.33	6.1	2.45	2.6	1356	0.4	8.3	8	#REF!	100	3	37.5	2	66.7	2	1	0	0.5	Yes
82	E	35	26.04	1	Secondary infertility	ICSI	7	1725	8	6.03	1.8	1.27	1.6	879	0.36	12.5	4	#REF!	100	3	100	3	100	3	1	1	0
308	G	34	25.44	1	Secondary infertility	IVF	4	1800	8	6.94	3.3	1.47	1.1	1471	0.5	9	2	#REF!	40	2	100	2	100	2	1	0	0
148	G	37	23.44	11	Secondary infertility	IVF	5	2325	9	6.42	1.5	1.21	0.7	463	0.31	11.6	4	#REF!	66.7	4	100	4	100	2	0.5	0	1
333	G	39	21.48	4	Secondary infertility	IVF	5	2925	12	5.55	1.8	1.37	0.5	753	2.5	10.4	5	#REF!	100	5	100	5	100	4	0.8	1	0.5
197	A	32	23.07	3	Primary infertility	ICSI	6	1725	8	4.16	1.3	1.76	3.1	990	0.67	7.4	4	#REF!	100	1	25	1	100	1	1	0	0
290	E	38	21.64	5	Secondary infertility	IVF	8	2025	9	17.36	2.7	2.29	2.1	514	0.12	8	4	#REF!	100	3	75	3	100	2	0.666667	1	0
350	F	38	28.23	1	Secondary infertility	IVF	5	3075	9	9.39	2.6	1.21	1.8	702	0.2	12.9	5	#REF!	100	4	80	4	100	3	0.75	0	0.5	Yes	Yes
374	D	38	18.82	2	Secondary infertility	IVF	6	2025	9	16.93	1.9	1.52	2	1696	0.39	12	4	#REF!	66.7	4	100	4	100	2	0.5	0	0
359	E	26	20.83	3	Secondary infertility	ICSI	5	1500	10	4.29	2.7	4.29	2.4	2316	0.6	11.6	9	#REF!	81.8	4	44.4	4	100	3	0.75	0	0
360	G	38	21.78	7	Primary infertility	ICSI	6	1950	8	5.61	3.6	10.33	0.7	2439	1	9.4	8	#REF!	100	3	37.5	3	100	1	0.333333	0	0
363	G	30	22.86	4	Primary infertility	IVF	5	2775	12	6.94	4.6	3.37	1.9	2603	1.1	11	9	#REF!	100	6	66.7	3	50	0	0	0	1
364	E	31	18.99	2	Secondary infertility	IVF	6	2025	9	7.13	4.2	1.38	3.4	1229	0.4	10.7	6	#REF!	100	6	100	6	100	4	0.666667	1	0	Yes
366	B	38	27.77	12	Secondary infertility	ICSI	7	3600	12	4.91	1.3	1.25	2.5	4119	1.8	13	7	#REF!	100	7	100	6	85.7	3	0.5	1	1
367	C	24	23.73	4	Secondary infertility	ICSI	8	2850	10	4.28	1	2.83	1.3	1226	1.1	6	6	#REF!	100	6	100	6	100	6	1	1	0.5
373	E	39	23.88	3	Secondary infertility	IVF	8	3225	11	8.14	2.5	1.36	1.9	2079	0.8	7.6	9	#REF!	100	6	66.7	4	66.7	2	0.5	0	0
375	G	34	21.23	1	Secondary infertility	IVF	7	3075	10	10.04	3.4	2.6	0.9	2231	0.5	13	9	#REF!	81.8	8	88.9	8	100	8	1	5	0.5
382	G	37	21.63	3	Secondary infertility	IVF	6	2025	9	4.74	2.7	3.47	0.7	1888	0.5	7.2	5	#REF!	100	5	100	5	100	5	1	2	0
403	F	33	21.23	2	Secondary infertility	ICSI	8	2550	12	5.24	1.5	4.67	0.9	4397	0.9	7.2	9	#REF!	100	8	88.9	8	100	5	0.625	2	0
410	G	31	20.96	2	Secondary infertility	IVF	6	1500	11	8.61	5	7.67	1.4	2356	0.8	8.8	9	#REF!	100	5	55.6	4	80	2	0.5	0	1
273	B	37	21.29	3	Secondary infertility	IVF	5	2775	9	17.13	1.4	1.66	2.3	657	0.23	6.9	4	#REF!	100	4	100	4	100	0	0	0	0.6
404	D	40	30.04	3	Secondary infertility	IVF	7	2025	8	6.95	2.5	1.34	3.1	939	0.45	10.1	4	#REF!	100	4	100	4	100	3	0.75	1	0	Yes	Yes
433	D	36	24.4	2	Secondary infertility	ICSI	7	2475	11	9.36	3	3.74	3.5	3527	1.6	10.8	8	#REF!	80	7	87.5	7	100	4	0.571429	2	1
124	D	44	19.71	3	Secondary infertility	IVF	7	2700	9	8.24	3.9	1.58	3.9	1864	0.58	12.9	4	#REF!	100	2	50	1	50	1	1	0	0.5
223	E	34	21.63	3	Primary infertility	IVF	6	1525	9	6.94	3	2.58	2.3	786	0.25	10.7	4	#REF!	80	3	75	3	100	2	0.666667	0	0	Yes
337	E	41	25.72	4	Secondary infertility	IVF	7	3225	10	10.25	3.7	5.53	2.85	897	0.35	11	4	#REF!	80	4	100	4	100	3	0.75	0	0.8
382	B	30	18.59	6	Secondary infertility	IVF	6	2625	9	6.1	1.87	1.22	3.44	1212	0.87	10.5	4	#REF!	80	2	50	2	100	2	1	0	1
450	G	35	24.03	1	Secondary infertility	ICSI	7	1575	7	5.15	2.2	1.68	0.7	710	0.3	8.5	3	#REF!	100	3	100	2	66.7	1	0.5	0	0
453	G	31	24.41	5	Primary infertility	IVF	5	2475	11	8.49	2.9	1.56	0.4	783	0.4	7.5	8	#REF!	100	7	87.5	6	85.7	2	0.333333	0	1
454	G	32	19.14	5	Primary infertility	IVF	7	2250	10	9.6	4.4	1.26	1.5	981	0.8	8.1	5	#REF!	83.3	5	100	5	100	2	0.4	0	1	Yes
458	G	35	23.73	1	Secondary infertility	IVF	9	2925	13	7.56	3.4	2.8	1.4	1818	0.4	9.8	4	#REF!	66.7	4	100	3	75	2	0.666667	0	0
462	G	35	24.03	2	Primary infertility	IVF	7	2325	9	5.79	3.3	2.18	1.5	1088	0.4	13.8	8	#REF!	100	7	87.5	7	100	6	0.857143	4	0.333333	Yes	Yes
470	G	37	19.2	2	Secondary infertility	IVF	7	2700	12	7.93	1.8	2.4	0.6	1678	0.6	13.4	5	#REF!	62.5	5	100	5	100	3	0.6	2	0	Yes	Yes
473	D	33	21.64	2	Secondary infertility	IVF	7	2025	9	6.5	3.3	1.46	3.5	596	0.5	10.2	1	#REF!	50	1	100	1	100	1	1	0	0.75
629	G	32	23.44	10	Primary infertility	ICSI	8	2100	9	6.5	2.4	1.47	0.93	411	0.24	13	4	#REF!	100	3	100	3	100	3	1	1	1	Yes	Yes
274	E	36	21.76	1	Secondary infertility	IVF	7	1950	9	6.84	2.2	1.25	2	1108	0.8	10	5	#REF!	83.3	5	100	5	100	3	0.6	1	0.75
303	G	35	21.88	2	Secondary infertility	IVF	7	1500	7	9.17	2.4	2	1	482	0.2	9.5	5	#REF!	100	4	80	3	75	2	0.666667	0	0.333333
494	E	25	19.53	1	Secondary infertility	IVF	6	2250	10	9.37	2.6	1.56	2.5	2733	0.8	11.2	5	#REF!	100	2	40	2	100	2	1	1	0
310	G	33	31.64	7	Primary infertility	IVF	6	2700	10	4.56	5.7	3.26	1.5	1069	0.3	13	5	#REF!	71.4	3	60	2	66.7	1	0.5	0	0.5
505	G	29	18.72	2	Secondary infertility	IVF	5	2100	11	13.55	4.1	1.59	2	637	0.5	10.8	3	#REF!	100	3	100	3	100	1	0.333333	0	0
508	A	38	29.69	10	Secondary infertility	IVF	7	4575	16	5.01	1.3	2	3.2	1079	0.5	12.1	3	#REF!	100	3	100	3	100	3	1	1	1
663	B	27	17.58	8	Primary infertility	IVF	7	1350	8	4.6	3.3	1.75	6.1	2105	0.5	10	5	#REF!	71.4	4	80	4	100	4	1	1	1	Yes	Yes
37	G	39	22.07	4	Secondary infertility	IVF	10	2250	10	9.27	4	1.44	0.5	1977	0.8	7.9	5	#REF!	100	5	100	5	100	3	0.6	2	0
515	G	30	23.44	3	Primary infertility	ICSI	8	2625	12	8.35	2.6	2.29	0.1	1288	1.1	10.8	5	#REF!	100	5	100	3	60	1	0.333333	0	0
352	G	37	20.43	3	Secondary infertility	IVF	5	2400	11	10.75	4.7	1.53	1.2	1588	0.3	13.8	5	#REF!	100	5	100	5	100	5	1	2	0
519	C	30	22.22	12	Primary infertility	IVF	5	3450	13	2.43	0.9	1.57	1.2	2934	1.5	9.8	4	#REF!	66.7	3	75	3	100	1	0.333333	0	0
533	D	37	20.14	3	Secondary infertility	IVF	8	1950	8	5.77	4.1	1.49	4.2	2620	1.2	8	5	#REF!	71.4	5	100	5	100	3	0.6	2	1
535	G	36	18.67	3	Secondary infertility	IVF	6	3600	12	7.33	1.9	1.61	0.2	2234	1.1	10	4	#REF!	80	4	100	4	100	2	0.5	0	1
872	G	39	25.81	4	Primary infertility	ICSI	7	2325	11	5.34	2.4	3.09	0.6	2438	1.1	7.8	5	#REF!	55.6	4	80	3	75	3	1	0	0.5
548	G	34	19.33	10	Primary infertility	IVF	5	2700	12	5.98	3.7	1.69	0.5	1460	0.6	11	7	#REF!	100	5	71.4	4	80	1	0.25	0	1
451	E	32	23.44	1	Secondary infertility	IVF	8	1750	9	7.34	2.2	1.38	2	1162	0.7	10.2	5	#REF!	100	4	80	4	100	3	0.75	1	0.6
552	G	29	22.19	6	Primary infertility	ICSI	6	2025	9	5.31	6.9	6.78	0.7	6507	2.2	9	9	#REF!	64.3	6	66.7	6	100	1	0.166667	1	0
553	G	23	24.14	3	Primary infertility	IVF	7	2250	10	10.04	1.8	1.53	0.2	688	0.2	9.4	5	#REF!	71.4	3	60	3	100	2	0.666667	0	0
490	F	36	17.22	1	Secondary infertility	IVF	7	2175	10	5.4	2.4	2.9	1.3	3232	0.5	10	5	#REF!	71.4	4	80	2	50	1	0.5	0	0
556	B	31	17.48	10	Primary infertility	IVF	6	2700	10	8.07	1.4	2.15	2.4	1227	0.5	12	3	#REF!	100	3	100	3	100	3	1	0	1
558	F	40	19.03	5	Primary infertility	IVF	6	2050	10	8.78	5	1.46	2.7	2150	0.7	12.3	6	#REF!	100	6	100	6	100	6	1	2	0
565	G	35	18.43	1	Primary infertility	IVF	7	1750	8	7.45	8	1.91	2.5	1146	1.1	9.9	2	#REF!	50	2	100	2	100	1	0.5	0	0
137	B	30	19.81	3	Secondary infertility	IVF	7	1650	8	6.42	2.9	2.32	4.9	2068	0.77	9	5	#REF!	100	5	100	5	100	5	1	1	0
570	G	29	19.98	4	Secondary infertility	IVF	6	2475	11	17.43	9.2	1.29	1.8	2432	0.8	10.7	6	#REF!	85.7	4	66.7	4	100	2	0.5	0	1
577	B	36	19.98	2	Secondary infertility	IVF	6	2400	10	6.24	3.3	1.51	5.5	1950	1.1	9	8	#REF!	100	8	100	8	100	2	0.25	1	0
589	F	42	23.93	3	Secondary infertility	IVF	6	4425	12	7.56	3.6	1.22	2.3	597	0.1	12	3	#REF!	100	3	100	3	100	1	0.333333	0	0
595	G	24	22.6	2	Secondary infertility	ICSI	6	3375	12	8.31	3.7	3.12	1.4	2156	0.3	10.6	7	#REF!	100	7	100	7	100	1	0.142857	0	0
597	E	33	20.32	1	Secondary infertility	IVF	6	2625	9	7.54	1.4	1.32	1.1	690	0.9	7.4	5	#REF!	71.4	5	100	5	100	4	0.8	1	1
602	F	34	24.8	7	Secondary infertility	IVF	7	2625	10	6.78	1.8	1.45	1.2	546	0.4	9.4	4	#REF!	66.7	4	100	4	100	1	0.25	0	0.5	Yes	Yes
614	C	27	20.2	2	Secondary infertility	IVF	7	1950	11	3.76	2.9	6.05	4.1	4197	1.1	11	5	#REF!	41.7	5	100	5	100	2	0.4	0	0
617	E	33	22.68	2	Primary infertility	IVF	6	2625	10	7.3	2.8	8.58	2.3	3216	0.8	11	5	#REF!	62.5	5	100	5	100	5	1	2	0	Yes	Yes
628	G	41	23.15	1	Secondary infertility	IVF	6	2025	9	8.04	5	2.04	1	2170	0.2	11.3	9	#REF!	100	9	100	9	100	9	1	5	0
635	A	30	26.67	4	Secondary infertility	ICSI	5	2825	12	6.48	1.3	2.48	2.6	3675	1	11	7	#REF!	87.5	4	57.1	4	100	3	0.75	1	0	Yes
638	C	38	27.06	4	Secondary infertility	ICSI	5	2250	10	5.59	2.9	1.51	3.8	801	0.4	10	5	#REF!	71.4	3	60	3	100	2	0.666667	0	0.75
641	E	28	21.67	3	Secondary infertility	IVF	7	2850	13	6.22	1.3	3	1.1	2362	0.9	11.5	5	#REF!	100	4	80	4	100	3	0.75	1	0.5
642	B	34	23.11	3	Secondary infertility	IVF	5	1350	9	8.77	0.9	6.41	1.5	2500	0.5	11.8	8	#REF!	88.9	6	75	2	33.3	1	0.5	0	0
643	A	35	24.03	1	Secondary infertility	ICSI	7	1575	7	3.93	1	1.68	2.1	416	0.2	9	2	#REF!	100	2	100	2	100	1	0.5	0	1
648	G	21	24.46	4	Primary infertility	IVF	8	2000	10	7.1	1.9	1.83	0.3	625	0.2	7	6	#REF!	100	4	66.7	4	100	3	0.75	0	0	Yes
649	G	35	20.96	1	Secondary infertility	IVF	8	2400	11	6.55	5.6	2.83	1.4	3242	1	10	8	#REF!	100	7	87.5	7	100	1	0.142857	0	0	Yes	Yes
651	G	29	21.36	2	Secondary infertility	IVF	6	2475	11	5.36	2.9	2.34	0.7	1814	0.4	9.4	9	#REF!	100	9	100	9	100	3	0.333333	1	0
667	F	26	19.4	1	Primary infertility	IVF	6	1350	9	5.28	2.7	1.29	2	2402	0.6	10.4	8	#REF!	88.9	6	75	6	100	5	0.833333	2	0.5	Yes	Yes
674	F	33	18.43	3	Primary infertility	IVF	7	2100	10	5.09	2.3	4.39	1.4	3403	1.6	13	6	#REF!	85.7	2	33.3	2	100	2	1	0	0
296	G	36	19.28	3	Secondary infertility	IVF	7	2850	10	13.11	4.4	1.2	0.9	847	0.99	13	5	#REF!	100	4	80	3	75	3	1	0	1
302	G	41	25.68	1	Secondary infertility	IVF	7	3525	10	5.59	3.9	1.27	1.3	1512	0.64	17.8	5	#REF!	100	4	80	4	100	4	1	1	0
683	G	41	20.83	1	Secondary infertility	ICSI	6	2025	9	6.86	3	2.76	1.1	1647	0.8	12	9	#REF!	100	5	55.6	4	80	0	0	0	0.285714
691	G	34	22.03	6	Primary infertility	IVF	5	2475	11	6.66	5.5	3.86	1.9	3433	1.7	8	7	#REF!	70	3	42.9	3	100	3	1	0	0
692	E	36	19.57	4	Secondary infertility	IVF	6	1950	9	5.89	3.3	2.33	2.5	1365	0.5	11	4	#REF!	80	3	75	2	66.7	2	1	0	0.666667
697	G	33	22.06	2	Primary infertility	IVF	7	2437.5	12	3.92	2.6	2.77	1.2	959	0.2	8.4	4	#REF!	100	4	100	4	100	3	0.75	1	0
698	G	30	16.22	4	Primary infertility	ICSI	8	2625	12	10.16	3.9	2.39	0.5	3730	1.2	11	5	#REF!	62.5	4	80	4	100	4	1	4	1
703	G	28	17.55	2	Primary infertility	ICSI	9	2100	10	8.62	3.9	3.68	0.6	1817	0.7	12.5	8	#REF!	100	6	75	6	100	3	0.5	0	0.333333
704	G	28	18.67	1	Secondary infertility	IVF	7	2575	14	9.45	4.9	5.88	1.9	5597	1.2	10.5	7	#REF!	87.5	7	100	7	100	5	0.714286	1	0
385	G	25	17.58	4	Secondary infertility	IVF	7	3150	14	13.92	3.7	1.38	0.3	1698	0.3	10.8	5	#REF!	71.4	2	40	2	100	1	0.5	0	0.5
715	E	40	19.13	2	Secondary infertility	IVF	5	2550	9	5.76	3	3.28	2.8	2693	0.8	11.2	6	#REF!	85.7	4	66.7	4	100	3	0.75	0	0
721	G	29	18.72	2	Secondary infertility	IVF	5	1425	7	6.55	2.6	1.59	0.7	880	0.3	10	2	#REF!	100	2	100	1	50	0	0	0	1
733	G	32	18.83	10	Primary infertility	ICSI	3	1500	10	5.73	4.8	2.18	0.8	5030	0.8	11.5	9	#REF!	81.8	5	55.6	5	100	2	0.4	2	1
734	G	29	20.96	2	Primary infertility	IVF	6	3225	17	5.63	3.1	2.84	0.5	2365	0.6	11.6	7	#REF!	77.8	6	85.7	6	100	0	0	0	0	Yes	Yes
739	G	25	26.04	5	Primary infertility	ICSI	3	1800	12	6.4	6.8	3.58	1.7	2695	0.6	9.5	7	#REF!	87.5	6	85.7	6	100	2	0.333333	0	0.8	Yes	Yes
370	F	40	19.96	1	Primary infertility	IVF	6	1725	7	7.55	4	3.03	2.31	461	0.65	8	5	#REF!	83.3	2	40	2	100	0	0	0	1
746	D	29	19.38	2	Primary infertility	IVF	7	2700	12	6.54	1.3	1.59	1.4	530	0.3	11	3	#REF!	100	3	100	3	100	3	1	1	1
759	D	40	22.03	3	Secondary infertility	IVF	6	2100	10	4.77	0.8	1.28	0.9	1574	0.6	9	5	#REF!	71.4	4	80	3	75	3	1	0	0	Yes
765	G	35	23.63	3	Primary infertility	IVF	5	2100	7	5.8	4.1	1.87	1.5	2035	0.4	7.5	5	#REF!	83.3	5	100	5	100	3	0.6	1	0
767	G	39	20.62	10	Primary infertility	ICSI	5	2025	9	6.54	6.5	2.48	2.5	1410	0.6	19	6	#REF!	100	4	100	4	100	3	0.75	1	0
770	F	34	16.02	3	Primary infertility	IVF	5	1800	8	5.47	3	3.34	1.9	1244	0.3	11	4	#REF!	100	4	100	4	100	2	0.5	0	1
660	G	31	18.44	2	Secondary infertility	ICSI	6	2275	11	7.3	5.21	2.87	1.27	2735	2.24	12.5	5	#REF!	50	4	100	4	100	3	0.75	1	0
688	F	40	21.44	8	Secondary infertility	IVF	5	3225	13	7.69	4.2	2.31	2.13	3496	0.98	10.1	5	#REF!	55.6	4	80	4	100	3	0.75	1	0.333333
228	F	32	19.03	4	Secondary infertility	ICSI	6	1950	9	8.11	6.1	3.08	4	1486	0.6	10	5	#REF!	100	3	60	3	100	3	1	1	0	Yes	Yes
776	G	33	17.53	1	Secondary infertility	IVF	6	1800	8	12.11	7.2	2.15	1.7	435	0.3	11	4	#REF!	100	3	75	3	100	3	1	0	0.6	Yes	Yes
780	G	31	20.51	2	Secondary infertility	ICSI	6	2475	11	6.15	1.4	1.35	0.4	2664	0.9	7.4	9	#REF!	100	7	77.8	7	100	7	1	4	0
256	G	37	23.88	7	Secondary infertility	IVF	7	2025	9	6.91	3.3	2.88	1.1	1439	0.5	11	6	#REF!	85.7	1	16.7	0	0	0	0	0	1
784	G	28	20.2	3	Primary infertility	IVF	7	1275	10	6.35	9	5.51	0.5	1294	0.6	9	7	#REF!	100	7	100	7	100	6	0.857143	2	1
285	F	35	19.48	5	Secondary infertility	IVF	7	2175	10	13.42	3.6	2.09	1.9	1328	0.8	9	6	#REF!	100	4	66.7	4	100	2	0.5	0	0
415	G	28	27.24	2	Secondary infertility	IVF	7	2025	9	8.08	4.9	1.78	0.8	1371	0.4	9.8	6	#REF!	100	4	66.7	4	100	4	1	1	0.75	Yes
635	G	39	21.63	2	Secondary infertility	IVF	6	2250	10	6.56	3.5	2.15	0.8	2811	1.1	12.1	6	#REF!	75	5	83.3	5	100	4	0.8	0	0	Yes	Yes
790	G	40	20.76	5	Primary infertility	IVF	6	2700	12	9.01	5.5	1.46	0.9	2753	1.4	12.9	9	#REF!	100	7	77.8	7	100	7	1	2	0
794	G	38	17.72	8	Secondary infertility	IVF	8	1575	7	6.49	3	2.19	1.3	637	0.4	9	4	#REF!	80	3	75	3	100	2	0.666667	0	0.5
799	F	33	17.78	4	Primary infertility	IVF	7	1500	10	6.11	4.8	2.17	2.6	1995	0.9	10	3	#REF!	60	3	100	2	66.7	1	0.5	0	1
664	F	31	20.94	5	Secondary infertility	IVF	9	1200	8	6.54	2.6	2.04	1.5	1047	0.4	11	6	#REF!	85.7	3	50	3	100	3	1	1	0	Yes	Yes
669	G	27	17.98	3	Primary infertility	ICSI	7	1350	9	6.43	8.6	4.11	1.6	2963	0.6	15.4	6	#REF!	85.7	4	66.7	4	100	2	0.5	0	0.25
812	G	35	23.44	2	Secondary infertility	IVF	5	1800	8	6.16	4.6	2.2	0.5	2549	0.8	8.4	8	#REF!	100	8	100	7	87.5	5	0.714286	2	0.5
815	C	37	24.46	1	Secondary infertility	IVF	7	2025	9	8.63	3.1	1.52	4.3	1277	3.2	8.7	2	#REF!	66.7	2	100	2	100	1	0.5	0	1
686	G	35	18.43	4	Secondary infertility	IVF	8	1775	9	4.8	4.5	2.9	0.8	2139	0.9	12.5	6	#REF!	100	5	83.3	5	100	1	0.2	0	0
34	G	28	18.03	3	Secondary infertility	ICSI	5	1350	8	4.54	2.3	1.31	0.5	769	0.3	10.3	6	#REF!	100	4	66.7	4	100	3	0.75	1	1	Yes	Yes
818	E	37	19.57	4	Secondary infertility	IVF	10	2400	8	7.93	2.1	2.33	1.8	944	0.3	9	4	#REF!	100	4	100	3	75	3	1	0	0.8
35	G	30	17.75	3	Secondary infertility	ICSI	7	1200	8	7.51	3.4	2.56	1	1000	0.9	10.6	6	#REF!	100	6	100	6	100	2	0.333333	0	0
823	G	31	19.14	3	Secondary infertility	IVF	7	1950	9	6.91	2.3	1.57	0.6	960	0.3	15	0	#REF!	0	0	0	0	0	0	0	0	1
38	G	25	18.73	1	Secondary infertility	IVF	6	1350	9	5.2	2.6	5.71	1	1556	0.7	8.2	6	#REF!	100	5	83.3	5	100	5	1	3	0.5	Yes
827	G	26	22.49	4	Primary infertility	ICSI	7	2025	9	10.09	5.6	2.23	0.9	1020	0.5	9	8	#REF!	100	8	100	8	100	5	0.625	2	0.25
828	F	35	24.44	3	Secondary infertility	IVF	7	1350	9	4.96	3.5	6.41	2.5	2576	0.7	11.2	9	#REF!	100	4	44.4	1	25	0	0	0	0
53	G	26	18.9	4	Secondary infertility	IVF	7	1350	9	7.74	3.9	1.3	0.5	729	0.5	10	6	#REF!	100	6	100	5	83.3	4	0.8	2	0
835	F	36	21.03	1	Primary infertility	IVF	8	1950	9	9.49	3.6	2.3	2.5	2670	1.1	11	9	#REF!	100	6	66.7	6	100	5	0.833333	3	0	Yes	Yes
756	D	28	28.47	5	Secondary infertility	IVF	5	3900	14	6.67	1.4	1.26	1.5	1012	0.4	12	6	#REF!	75	6	100	4	66.7	2	0.5	1	1	Yes
841	G	28	18.49	7	Secondary infertility	IVF	7	1537.5	11	6.74	3.9	8.02	1.1	1338	0.2	9	2	#REF!	66.7	1	50	1	100	1	1	0	0.6
881	G	39	19.57	12	Secondary infertility	ICSI	6	3150	14	11.08	4.8	2.66	1.1	1591	0.5	11.9	6	#REF!	100	5	83.3	5	100	5	1	2	0
901	G	32	22.48	5	Secondary infertility	IVF	7	1575	11	4.79	4.7	3.06	1.6	3920	1.3	12.8	6	#REF!	100	6	100	6	100	3	0.5	0	0.4
852	E	32	23.31	2	Secondary infertility	ICSI	7	2700	12	3.52	2.3	3.82	2.2	2904	0.9	14	6	#REF!	100	5	83.3	4	80	2	0.5	0	1	Yes	Yes
853	G	40	24.65	5	Secondary infertility	IVF	7	2700	12	6.08	2.9	2.11	0.5	4872	1.5	13.4	7	#REF!	77.8	7	100	7	100	6	0.857143	4	0
854	E	40	19.49	2	Secondary infertility	IVF	6	2025	9	6.51	3.2	3.28	2.4	1590	0.4	11.7	8	#REF!	100	7	87.5	7	100	5	0.714286	3	0
434	B	35	22.48	4	Primary infertility	IVF	8	1350	9	7.18	2.5	4.03	4.3	1542	0.8	9.3	6	#REF!	100	6	100	6	100	5	0.833333	2	0	Yes	Yes
861	G	39	22.35	6	Secondary infertility	IVF	6	2700	12	5.21	3.2	4.13	1.1	4314	1.5	14	6	#REF!	100	6	100	5	83.3	2	0.4	0	1
441	A	31	22.89	7	Primary infertility	IVF	6	1875	11	8.17	2.1	2.5	7.3	2242	1	9.8	6	#REF!	100	5	83.3	5	100	3	0.6	1	1	Yes
864	G	36	21.72	2	Secondary infertility	IVF	9	3600	17	6.03	6.3	5.98	1	3869	1.3	11.6	9	#REF!	100	8	88.9	7	87.5	2	0.285714	2	0
866	F	39	18.82	1	Secondary infertility	IVF	7	3225	12	7.62	4	3.35	2.1	3965	0.8	11	8	#REF!	100	8	100	8	100	4	0.5	1	0
867	E	35	24.41	2	Secondary infertility	ICSI	9	2250	10	8.93	3.2	1.3	3	852	0.3	10.8	2	#REF!	66.7	2	100	2	100	1	0.5	0	0
487	G	32	21.79	6	Secondary infertility	IVF	7	1950	9	6.28	5.6	5.69	1.2	937	0.3	11.5	6	#REF!	100	5	83.3	5	100	3	0.6	4	1
133	D	43	21.79	2	Secondary infertility	ICSI	10	2250	10	7.07	2.7	2.61	2.7	3225	0.53	14.7	6	#REF!	85.7	3	75	3	100	2	0.666667	3	0.666667
882	G	31	17.58	2	Primary infertility	IVF	9	1950	13	4.69	3.7	1.98	0.6	3036	2.2	9.4	7	#REF!	87.5	6	85.7	6	100	5	0.833333	1	1
132	G	43	20.83	2	Secondary infertility	IVF	6	2925	11	7.54	3	1.91	1.2	1311	0.68	9.8	6	#REF!	100	5	83.3	5	100	3	0.6	0	0
893	G	27	20.83	1	Secondary infertility	IVF	8	2475	11	4.88	2.8	2.2	0.9	3476	1.1	11.3	9	#REF!	81.8	9	100	9	100	7	0.777778	6	0
278	G	34	26.56	4	Primary infertility	ICSI	6	1550	8	5.76	3.9	4.27	0.8	442	0.15	10.6	6	#REF!	100	3	60	3	100	3	1	2	0
411	G	32	20.31	12	Secondary infertility	IVF	0	2250	10	6.9	3.4	1.55	1	1005	0.71	10.3	6	#REF!	100	6	100	6	100	4	0.666667	3	0.5	Yes	Yes
259	E	29	24.97	1	Primary infertility	ICSI	7	1900	10	7.45	2.2	2.72	1.7	2179	0.86	12.6	6	#REF!	75	2	66.7	2	100	0	0	1	0.666667
907	G	29	21.08	3	Secondary infertility	IVF	5	2650	13	9.55	2.78	2.82	0.8	1375	0.4	11	5	#REF!	100	5	100	4	80	4	1	0	0	Yes	Yes
909	G	34	18.2	8	Primary infertility	ICSI	5	1650	11	6.36	5	3.08	1.6	1496	1.2	10.2	8	#REF!	88.9	5	62.5	5	100	4	0.8	0	0.333333
14	G	37	21.91	2	Primary infertility	IVF	6	2262.5	12	5.31	3.5	2.73	0.4	3284	2.2	9	9	#REF!	100	9	100	8	88.9	6	0.75	5	0.6
659	G	27	17.63	1	Secondary infertility	IVF	7	1350	9	4.66	3.4	3.8	0.6	2401	0.9	9.8	7	#REF!	77.8	6	85.7	6	100	3	0.5	1	0.5
16	G	35	20.7	1	Secondary infertility	ICSI	8	2400	11	9.73	4.5	2.67	0.7	2407	1.5	13.6	6	#REF!	75	5	83.3	4	80	1	0.25	0	0.5
23	G	36	19.47	3	Secondary infertility	IVF	8	2700	12	12.86	3.7	1.75	0.5	2321	1.2	11	7	#REF!	100	6	85.7	6	100	5	0.833333	3	0.666667
25	G	29	17.97	3	Primary infertility	IVF	8	2325	12	9.24	3	3.86	1.2	2879	0.4	10	6	#REF!	100	5	83.3	4	80	3	0.75	0	0.666667
30	G	35	24.65	3	Primary infertility	ICSI	7	3000	12	6.3	1.8	1.57	0.6	2038	0.8	14	3	#REF!	50	2	66.7	2	100	1	0.5	0	0
689	G	33	16.65	5	Secondary infertility	IVF	7	1500	10	6.18	4.8	4.2	0.7	1322	0.3	11	7	#REF!	87.5	7	100	6	85.7	3	0.5	1	0.333333
692	D	29	19.1	1	Primary infertility	IVF	8	1800	10	5.73	2.1	1.27	2.2	1492	0.6	10	7	#REF!	100	3	42.9	2	66.7	2	1	0	0	Yes	Yes
40	G	32	24.61	2	Secondary infertility	IVF	6	2250	10	3.73	1.7	6.11	0.4	2542	0.9	13	9	#REF!	75	8	88.9	8	100	5	0.625	3	0
693	G	32	18	1	Secondary infertility	IVF	6	1350	9	6.18	2.1	2.29	1	846	0.3	10	7	#REF!	100	5	71.4	4	80	1	0.25	1	0	Yes	Yes
49	F	35	22.31	4	Secondary infertility	IVF	5	1875	10	4.7	1.9	1.35	1.2	1582	0.9	10.9	2	#REF!	50	2	100	2	100	1	0.5	0	0.2
52	G	26	20.56	3	Secondary infertility	IVF	6	1500	10	7.93	4.7	3.76	1.7	2539	1	10	7	#REF!	77.8	7	100	7	100	5	0.714286	2	0
54	F	38	30.08	2	Primary infertility	IVF	5	2400	10	6.82	5.4	1.84	3.5	789	0.5	11.9	0	#REF!	0	0	0	0	0	0	0	0	0
57	B	41	18.37	3	Secondary infertility	IVF	6	2025	9	4.25	2.3	2.02	4	2350	1.3	9.6	4	#REF!	100	4	100	4	100	2	0.5	0	0
63	G	34	21.09	1	Secondary infertility	IVF	9	2925	13	4.37	2.5	4.09	0.9	3990	2.4	10.8	7	#REF!	63.6	5	71.4	5	100	2	0.4	2	0
65	G	34	28.13	4	Secondary infertility	IVF	7	3225	12	6.88	2.7	1.26	1.3	2082	0.5	11.4	8	#REF!	100	5	62.5	4	80	3	0.75	1	0	Yes	Yes
55	G	31	18.9	6	Primary infertility	IVF	6	1275	9	6.7	3.1	2.64	0.9	1458	0.5	9.5	7	#REF!	100	1	14.3	1	100	0	0	0	0
346	C	27	22.43	2	Primary infertility	ICSI	6	2025	10	5.03	1.1	1.83	1.6	1310	0.3	10.5	7	#REF!	87.5	7	100	7	100	3	0.428571	2	0
76	B	35	22.68	0	Secondary infertility	IVF	5	3075	12	6.17	1.5	2.08	2.5	1511	0.9	13.5	4	#REF!	80	3	75	3	100	2	0.666667	0	0
81	F	28	25.08	5	Primary infertility	IVF	8	2125	12	4.97	3.6	8.2	2.6	577	0.2	11.2	2	#REF!	100	2	100	1	50	0	0	0	1
466	B	24	22.49	3	Primary infertility	ICSI	6	2025	9	9.37	1	1.55	1.5	1055	0.6	12.3	7	#REF!	100	4	57.1	4	100	1	0.25	0	1
85	G	32	22.67	4	Primary infertility	IVF	6	4650	17	12.27	7.1	7.27	1.6	2890	0.5	5	6	#REF!	100	5	83.3	4	80	3	0.75	0	0
88	G	34	19.91	3	Secondary infertility	IVF	5	2400	11	4.92	6.3	2.35	2	3793	1.9	11.2	8	#REF!	72.7	7	87.5	7	100	5	0.714286	0	0
93	F	37	20.96	3	Secondary infertility	IVF	6	2250	8	5.27	2.1	1.86	1.5	1440	0.7	7.2	4	#REF!	100	4	100	4	100	0	0	0	0
99	D	28	23.03	4	Primary infertility	ICSI	8	2025	9	3.95	3.3	3.21	4	1679	0.3	11.5	7	#REF!	100	6	85.7	6	100	6	1	2	0.5
101	G	29	19.83	5	Primary infertility	IVF	8	2325	11	7.67	4.6	2.47	1.4	2131	0.5	12	6	#REF!	100	6	100	6	100	2	0.333333	0	0.666667	Yes	Yes
104	F	39	20.12	7	Secondary infertility	IVF	8	1800	8	7.67	3	1.79	1.6	536	0.1	8.8	3	#REF!	100	2	66.7	2	100	1	0.5	0	0	Yes	Yes
115	G	32	22.43	7	Primary infertility	IVF	6	1112.5	11	5.46	7.9	9.93	3.7	2491	0.4	11.3	7	#REF!	100	7	100	7	100	5	0.714286	1	0	Yes
117	G	35	28.58	3	Secondary infertility	IVF	9	2700	12	6.48	2.9	1.68	0.8	761	0.1	9.8	9	#REF!	100	8	88.9	7	87.5	4	0.571429	3	0.833333
122	F	36	18.87	5	Secondary infertility	ICSI	7	2250	10	5.34	1.4	1.79	0.7	1541	0.6	11.2	7	#REF!	87.5	7	100	7	100	5	0.714286	4	0.5
126	F	40	22.43	5	Primary infertility	IVF	5	2700	11	6.49	2.2	1.53	1.5	2183	0.5	13	9	#REF!	100	8	88.9	8	100	4	0.5	2	0
837	D	38	24.03	8	Secondary infertility	IVF	6	2400	11	7.41	1.6	2.53	1.9	1329	0.4	9.7	7	#REF!	100	6	85.7	6	100	4	0.666667	1	0
862	G	31	15.61	4	Primary infertility	ICSI	10	2287.5	12	6.59	2.4	1.8	0.8	3127	0.8	11	7	#REF!	100	5	71.4	5	100	4	0.8	1	0	Yes	Yes
133	E	42	20.03	22	Primary infertility	ICSI	7	2025	9	7.43	4.3	1.55	4	713	0.3	13	2	#REF!	100	1	50	1	100	1	1	0	0
135	G	41	22.77	2	Secondary infertility	IVF	7	2850	12	7.27	4.7	2.49	0.7	2189	0.7	10	9	#REF!	100	8	88.9	6	75	3	0.5	2	1
137	A	35	22.77	3	Secondary infertility	IVF	6	1725	12	3.21	1.3	8.81	2.8	4751	0.9	13	8	#REF!	88.9	7	87.5	7	100	6	0.857143	3	0
139	G	35	25.59	4	Secondary infertility	ICSI	8	3750	12	6.89	2.6	1.86	1.2	4012	1.1	11	6	#REF!	100	4	66.7	3	75	3	1	0	0
140	G	33	22.48	3	Primary infertility	IVF	6	2075	11	10.29	8.1	5.82	1	2453	0.1	11	7	#REF!	77.8	7	100	6	85.7	4	0.666667	2	0.333333
906	G	29	19.48	4	Secondary infertility	IVF	7	1575	13	5.24	3	9	1.4	4608	1.6	10.7	7	#REF!	100	6	85.7	5	83.3	2	0.4	0	0
145	D	41	16.59	3	Secondary infertility	IVF	7	1762.5	9	8.98	2.9	1.47	3.1	469	0.4	11	2	#REF!	66.7	0	0	0	0	0	0	0	1
154	C	36	26.23	8	Primary infertility	ICSI	6	2550	12	5.99	0.3	1.75	0.4	1017	0.3	7.2	5	#REF!	62.5	4	80	4	100	1	0.25	0	1
159	G	31	19.6	5	Secondary infertility	IVF	5	2475	11	6.4	2.2	3.98	1	7327	1.4	8.7	8	#REF!	66.7	7	87.5	7	100	2	0.285714	3	0
162	D	31	19.34	3	Secondary infertility	IVF	7	1350	6	9.15	1.6	1.57	1.7	630	0.1	11	2	#REF!	66.7	2	100	2	100	1	0.5	0	0.5
164	G	38	29.69	11	Secondary infertility	IVF	7	2475	10	4.89	3.3	2	0.8	349	4.6	10.5	1	#REF!	100	0	0	0	0	0	0	0	0
78	F	37	23.05	11	Secondary infertility	IVF	8	2550	10	6.15	1.9	1.21	1.1	736	0.42	14	7	#REF!	100	7	100	7	100	1	0.142857	0	0
181	G	33	16.6	5	Primary infertility	IVF	7	2025	8	11.71	6.2	1.32	0.7	1091	0.3	11.4	8	#REF!	100	3	37.5	2	66.7	2	1	0	0	Yes	Yes
185	G	30	19.14	4	Secondary infertility	IVF	6	2400	10	11.01	3.1	1.3	1.2	2141	0.8	12.7	8	#REF!	100	7	87.5	7	100	4	0.571429	2	1
190	G	29	21.48	4	Primary infertility	ICSI	7	1500	10	5.65	2.9	4.5	0.7	1328	0.4	9.4	9	#REF!	90	4	44.4	2	50	2	1	0	0	Yes	Yes
196	F	37	19.98	2	Secondary infertility	IVF	7	2025	9	5.3	3	1.51	1.9	1568	0.3	11	5	#REF!	83.3	5	100	5	100	3	0.6	0	0
80	F	40	20.37	5	Primary infertility	IVF	7	1800	8	5.83	2	1.89	1.2	1217	1.14	8	7	#REF!	100	4	57.1	4	100	2	0.5	0	1
209	A	28	19.83	2	Primary infertility	IVF	5	1800	8	3.24	0.6	2.11	1.7	1112	0.3	9.6	3	#REF!	60	3	100	3	100	1	0.333333	0	0	Yes	Yes
214	F	30	19.53	2	Secondary infertility	IVF	8	1575	7	5.71	1.4	1.52	0.7	400	0.2	10	6	#REF!	100	4	66.7	4	100	2	0.5	0	0.5	Yes	Yes
222	B	36	21.49	1	Secondary infertility	IVF	6	1575	7	7.31	2.3	1.28	4.1	776	1.5	7.4	3	#REF!	100	2	66.7	1	50	0	0	0	1
226	G	30	19.4	3	Secondary infertility	IVF	6	1950	9	7.12	2.9	1.59	0.7	784	0.4	13	5	#REF!	100	4	80	4	100	2	0.5	1	0.5
229	G	30	22.48	4	Secondary infertility	IVF	10	2250	10	5.16	3.1	2.06	1.1	1923	0.5	7.4	5	#REF!	50	5	100	5	100	3	0.6	1	1
233	G	29	34.17	2	Secondary infertility	ICSI	7	2400	8	6.27	2.5	1.39	0.6	1444	0.3	7.8	5	#REF!	100	4	80	3	75	1	0.333333	0	0.8
236	G	31	19.14	3	Secondary infertility	IVF	7	2400	8	12.87	3.6	1.57	1.1	1270	0.2	12.5	4	#REF!	100	3	75	3	100	2	0.666667	0	1	Yes	Yes
249	F	35	22.32	1	Secondary infertility	IVF	8	1800	8	11.49	4.1	2.48	2.3	777	0.3	9	3	#REF!	60	3	100	3	100	3	1	0	0.6	Yes
257	G	32	21.09	6	Primary infertility	IVF	7	1950	9	6.94	4.5	1.48	1.3	613	0.3	10.6	3	#REF!	42.9	3	100	3	100	2	0.666667	0	0
260	G	30	24.03	11	Secondary infertility	ICSI	8	1950	9	7.51	1.9	1.45	0.6	405	0.3	11.9	2	#REF!	100	2	100	2	100	1	0.5	0	0.4
262	G	30	19.57	2	Primary infertility	IVF	6	2475	11	8.18	4.8	2.44	0.6	1124	0.2	12	7	#REF!	100	6	85.7	6	100	4	0.666667	1	0.5	Yes	Yes
274	F	32	18.71	2	Secondary infertility	IVF	6	2325	9	7.72	3.8	3.22	2.3	2782	1.1	11	7	#REF!	87.5	7	100	7	100	4	0.571429	3	1	Yes	Yes
138	G	34	23.73	1	Secondary infertility	IVF	5	2350	12	5.16	3.1	1.65	0.8	2886	1.06	13	7	#REF!	77.8	7	100	7	100	2	0.285714	1	1
281	C	34	22.31	5	Primary infertility	IVF	7	2250	10	7.04	2	2.09	2.9	1600	0.7	14	6	#REF!	75	6	100	5	83.3	2	0.4	2	1
289	E	37	22.04	1	Secondary infertility	IVF	5	1350	6	5.74	2.6	1.28	2.2	773	0.4	8.5	4	#REF!	100	4	100	4	100	2	0.5	0	0.75	Yes
296	G	31	19.61	4	Primary infertility	ICSI	6	2050	10	7.73	4.2	2.48	1.9	1673	0.4	10	9	#REF!	100	6	75	3	50	3	1	0	0
303	G	28	17.01	1	Primary infertility	ICSI	7	2025	9	7.68	7	3.58	2.7	2403	0.5	11	8	#REF!	100	5	62.5	5	100	0	0	0	1	Yes	Yes
306	G	28	30.08	2	Primary infertility	IVF	7	1975	11	4.61	4.8	6.9	1.6	1466	0.2	11	4	#REF!	66.7	4	100	2	50	2	1	0	0.833333	Yes	Yes
314	G	35	24.8	7	Secondary infertility	IVF	8	1950	9	6.95	3	1.23	0.5	786	0.3	10	4	#REF!	100	4	100	4	100	4	1	2	0
174	C	41	28.58	1	Secondary infertility	ICSI	5	3300	10	5.67	1.1	2.7	1.6	1065	0.47	10	7	#REF!	100	2	40	2	100	2	1	0	0
320	E	41	22.96	3	Secondary infertility	ICSI	6	3600	13	9.93	3.8	1.25	3.4	1276	0.7	12	2	#REF!	100	1	50	1	100	0	0	0	0
323	G	31	24.97	2	Secondary infertility	IVF	6	1800	8	8.65	3.5	1.43	0.7	258	0.1	10.1	2	#REF!	50	1	50	0	0	0	0	0	1
324	G	37	18.43	6	Secondary infertility	ICSI	7	1200	8	7.75	4.4	6.42	0.7	1019	0.2	8.5	7	#REF!	87.5	4	57.1	4	100	3	0.75	1	0.6
326	C	30	23.63	4	Primary infertility	ICSI	6	1575	11	7.15	7.1	9.93	9.3	3939	2.2	9.1	6	#REF!	85.7	4	100	3	75	3	1	0	0
327	G	35	21.23	11	Primary infertility	ICSI	6	1950	9	5.48	3.1	2.69	0.6	2237	1.6	11.4	9	#REF!	100	5	55.6	5	100	2	0.4	1	0
328	F	39	19.92	1	Secondary infertility	IVF	8	2250	10	4.86	3.1	4.2	1.7	2366	1.9	9.7	5	#REF!	71.4	3	60	3	100	1	0.333333	0	0
333	G	33	19.38	2	Secondary infertility	IVF	6	1725	12	5.89	3.4	4.99	0.8	3848	0.8	10.6	6	#REF!	85.7	5	83.3	5	100	2	0.4	1	0
338	G	34	25.24	10	Primary infertility	IVF	6	2250	13	4.18	2	7.29	0.5	867	0.3	9.5	9	#REF!	81.8	8	88.9	8	100	4	0.5	1	0	Yes	Yes
343	C	41	22.96	3	Secondary infertility	ICSI	8	3900	12	4.83	0.8	1.25	1.1	882	0.3	13	5	#REF!	100	5	100	3	60	3	1	0	0	Yes	Yes
359	G	30	26.71	3	Primary infertility	IVF	7	1675	8	6.74	4.9	4.07	1.9	2012	0.3	12	7	#REF!	70	3	42.9	0	0	0	0	0	0
262	E	43	19.33	1	Secondary infertility	IVF	6	2250	10	8.08	2.8	4.55	2.2	1293	0.4	8	8	#REF!	100	8	100	8	100	7	0.875	2	0.666667
362	E	37	20.77	1	Secondary infertility	IVF	7	2100	10	7.16	2	1.24	1.9	2285	0.9	10	4	#REF!	66.7	3	75	3	100	0	0	0	0
290	G	35	26.7	7	Primary infertility	IVF	8	2700	12	6.32	6.7	11.62	2.6	3200	0.6	10.3	8	#REF!	100	8	100	8	100	3	0.375	2	0.5	Yes	Yes
313	G	39	24	3	Secondary infertility	ICSI	8	2100	10	7.08	3.8	2.36	1.5	2890	0.6	10	8	#REF!	80	6	75	6	100	4	0.666667	2	0.5
640	G	24	18.75	1	Secondary infertility	IVF	6	1550	10	4.39	3.3	7.95	0.2	2876	2.5	10	8	#REF!	72.7	7	87.5	7	100	0	0	0	0
379	F	34	23.83	6	Primary infertility	ICSI	10	2250	9	6.29	3.5	2.83	2.2	1904	0.7	16	5	#REF!	100	5	100	5	100	3	0.6	2	0.5
678	F	35	23.68	4	Primary infertility	IVF	7	2700	12	6.04	2.6	4.29	1.6	1460	0.8	12	8	#REF!	88.9	7	87.5	7	100	5	0.714286	2	0.333333
381	G	34	23.56	4	Primary infertility	ICSI	7	2175	11	11.66	5	4.29	1.3	645	0.2	11	2	#REF!	100	1	50	1	100	1	1	0	1
382	C	33	26.67	2	Secondary infertility	IVF	9	2125	12	9.51	4.6	1.71	6.6	2313	0.7	8.9	7	#REF!	100	6	85.7	6	100	3	0.5	2	1	Yes	Yes
684	G	28	20.17	2	Secondary infertility	IVF	5	1650	11	4.11	5.9	4.31	0.7	2451	0.7	10.5	8	#REF!	100	8	100	8	100	8	1	2	1
47	F	24	20.28	1	Primary infertility	IVF	5	2775	12	6.17	3.2	5.23	2.2	1401	0.5	12.1	8	#REF!	100	6	75	5	83.3	4	0.8	1	0.833333
195	E	28	27.64	1	Primary infertility	ICSI	10	1800	9	5.38	3.7	3.92	3	1036	0.5	10.1	8	#REF!	100	5	62.5	5	100	4	0.8	3	0
307	E	40	21.63	6	Secondary infertility	ICSI	9	2025	9	7.59	1.3	2.14	1.1	946	1.2	13	8	#REF!	88.9	5	62.5	4	80	2	0.5	0	1
414	G	39	20.55	2	Secondary infertility	IVF	6	2700	12	6.51	5.8	1.99	1.1	2267	0.6	10.8	8	#REF!	88.9	6	75	4	66.7	2	0.5	1	1	Yes
403	B	33	19.5	6	Primary infertility	IVF	5	1575	7	7.25	3	1.2	5.1	694	0.3	8	2	#REF!	100	2	100	2	100	1	0.5	0	1
404	G	28	20	2	Primary infertility	IVF	6	1500	10	6.58	4	1.37	0.9	1023	0.3	10.5	6	#REF!	85.7	6	100	6	100	5	0.833333	2	0.5	Yes
405	E	40	20.83	4	Primary infertility	IVF	6	1575	7	8.48	4.7	1.21	3.9	740	0.1	12.5	2	#REF!	100	2	100	2	100	2	1	0	0
410	G	30	20.06	5	Primary infertility	IVF	4	1050	7	6.28	2.9	3.79	0.7	863	0.3	11	3	#REF!	75	3	100	3	100	3	1	0	0.5	Yes	Yes
417	F	32	18.73	1	Secondary infertility	IVF	10	1200	8	5.65	2.9	1.84	2	1149	0.4	7.6	6	#REF!	100	5	83.3	4	80	3	0.75	0	1
427	F	37	22.66	1	Secondary infertility	IVF	6	2325	8	8.02	4.7	1.51	3.4	1337	0.6	14	3	#REF!	75	3	100	3	100	3	1	1	0	Yes	Yes
428	F	33	20.24	2	Secondary infertility	IVF	8	700	7	6.02	5.5	9.1	3.1	2779	0.8	9.1	8	#REF!	100	8	100	8	100	7	0.875	6	0
677	G	30	18.82	1	Secondary infertility	IVF	13	1350	11	7.48	5.6	7.95	2	4983	0.5	16	8	#REF!	80	3	37.5	3	100	1	0.333333	0	0
431	G	31	19.53	3	Secondary infertility	IVF	12	1600	8	7.82	3.1	1.4	1.4	1484	0.4	13.4	7	#REF!	100	7	100	7	100	5	0.714286	4	0
752	G	27	25	2	Primary infertility	IVF	6	2700	12	7.14	1.6	2.04	0.6	1193	0.4	10.8	8	#REF!	100	8	100	8	100	6	0.75	4	1
785	F	24	21.64	1	Secondary infertility	IVF	8	1425	10	4.69	2.2	6.29	1.6	4539	1.4	8.6	8	#REF!	88.9	8	100	8	100	4	0.5	2	0	Yes	Yes
436	F	30	27.01	4	Primary infertility	ICSI	7	2250	10	6.69	3.2	2.08	1.6	1074	0.5	14.6	9	#REF!	100	7	77.8	7	100	4	0.571429	2	0.25	Yes	Yes
437	E	38	22.58	1	Primary infertility	IVF	8	1400	7	5.63	5.5	6.69	4.9	1814	0.5	9	8	#REF!	88.9	8	100	7	87.5	6	0.857143	3	0.666667
37	G	31	17.72	2	Secondary infertility	ICSI	6	1950	10	5.01	1.2	1.91	0.4	2180	2.1	9.5	8	#REF!	100	6	75	6	100	5	0.833333	3	1
444	F	32	23.81	1	Secondary infertility	IVF	6	1750	9	5.63	3.1	2.28	1.7	1055	0.3	13.4	8	#REF!	88.9	3	37.5	1	33.3	0	0	0	0
463	G	28	18.37	3	Primary infertility	IVF		1650	12	5.91	7.8	9.88	1.5	2940	0.8	10.4	8	#REF!	88.9	5	62.5	4	80	3	0.75	0		Yes	Yes
445	C	28	19.03	1	Primary infertility	IVF		1500	9	5.47	2.9	2.46	4.3	2581	0.6	12	8	#REF!	100	4	50	4	100	2	0.5	0
23	G	24	18.14	1	Primary infertility	IVF		1350	9	7.73	3.7	4.34	1.8	1833	0.2	14.6	8	#REF!	100	7	87.5	7	100	4	0.571429	2
448	G	31	19.14	5	Primary infertility	ICSI		1500	10	6.4	6.4	3.52	0.8	2649	1	10.5	9	#REF!	100	6	66.7	6	100	4	0.666667	1
450	G	30	24.97	4	Primary infertility	IVF		1875	9	7.84	5	2.65	1.5	2865	0.8	11.4	6	#REF!	100	5	83.3	5	100	5	1	3
213	E	34	22.03	4	Secondary infertility	IVF		2250	9	7.92	1.8	1.62	1.5	963	0.48	9.3	8	#REF!	100	3	37.5	2	66.7	1	0.5	0		Yes	Yes
454	G	39	18.55	10	Secondary infertility	IVF		2000	10	7.39	5	2.52	1.9	2080	0.8	10.6	6	#REF!	100	6	100	6	100	3	0.5	0		Yes	Yes
455	E	35	19.91	3	Secondary infertility	IVF		2025	9	7.34	9.7	4.68	7.9	1632	1.1	12.8	4	#REF!	80	3	75	3	100	3	1	1		Yes	Yes
460	G	32	20.7	1	Secondary infertility	IVF		1500	10	8.22	2.2	2.55	0.8	1477	0.5	11.4	4	#REF!	80	3	75	3	100	1	0.333333	0
461	F	36	24.64	2	Secondary infertility	IVF		1200	8	3.91	4.4	4.99	2.8	1972	0.3	12	9	#REF!	100	8	88.9	8	100	4	0.5	1
574	F	40	22.89	6	Primary infertility	ICSI		1950	8	5.22	4.12	2.46	2.79	1198	0.73	12.6	8	#REF!	100	6	100	6	100	2	0.333333	0
585	F	34	28.76	3	Secondary infertility	ICSI		1950	10	7.26	4.06	2.75	2.03	2778	0.69	13.3	8	#REF!	100	3	60	3	100	2	0.666667	0		Yes
644	E	35	21.77	1	Secondary infertility	IVF		1500	10	4.97	1.82	4.72	1.55	1221	0.33	7.1	8	#REF!	100	6	75	6	100	5	0.833333	3
480	F	33	18.49	5	Primary infertility	IVF		1500	10	5.32	3.8	2.25	2.2	3126	1.5	12.5	1	#REF!	16.7	1	100	1	100	0	0	0
481	F	26	24.11	1	Primary infertility	IVF		1800	6	4.9	1.8	1.6	1.3	368	0.3	7.8	2	#REF!	50	1	50	1	100	1	1	0
482	G	31	19.74	2	Primary infertility	IVF		2250	10	4.49	4.6	2.63	1.3	1670	0.5	13.8	9	#REF!	100	7	77.8	7	100	3	0.428571	1		Yes	Yes
654	G	38	22.03	4	Secondary infertility	IVF		2775	11	9.48	3.66	1.4	1.23	1846	1.74	14	8	#REF!	100	4	50	2	50	1	0.5	0
270	G	27	27.34	4	Secondary infertility	IVF		3550	13	7.75	4.1	5.58	1.9	3229	1	10	9	#REF!	90	8	88.9	7	87.5	6	0.857143	4
411	E	25	22.34	3	Primary infertility	ICSI		2100	11	5.04	4.3	4.32	3.6	4324	1.9	12.4	9	#REF!	90	6	66.7	5	83.3	5	1	1
492	F	26	23.73	2	Secondary infertility	IVF		2025	9	7.24	3	3.06	1.7	1120	0.3	12	6	#REF!	100	5	83.3	5	100	4	0.8	3
632	G	25	19.96	2	Primary infertility	ICSI		1325	9	5.44	4.4	8.1	1.9	5041	1	12.1	9	#REF!	56.2	8	88.9	8	100	7	0.875	3
30	G	29	19.23	2	Primary infertility	ICSI		1500	10	8.84	4.4	3.23	1.3	3490	0.6	10.1	9	#REF!	100	7	77.8	7	100	6	0.857143	2		Yes	Yes
36	G	26	24.44	5	Primary infertility	ICSI		1050	7	6.9	8.1	9	2	4307	0.6	9.4	9	#REF!	100	5	55.6	5	100	2	0.4	0
76	G	36	27.43	3	Secondary infertility	ICSI		2400	11	5.58	2.5	1.44	1.1	3074	0.7	13.6	9	#REF!	100	3	33.3	3	100	2	0.666667	0
503	F	44	22.27	3	Primary infertility	ICSI		1800	8	5.73	2.4	1.41	1.6	2613	0.9	14	3	#REF!	100	2	66.7	2	100	2	1	0
77	G	30	21.1	1	Primary infertility	ICSI		1300	10	3.45	1.5	7.02	0.4	3218	0.5	13.5	9	#REF!	100	5	55.6	4	80	3	0.75	1		Yes	Yes
545	G	31	21.1	4	Primary infertility	ICSI		1775	13	7.23	4.9	6.68	1.3	4471	1.7	11	9	#REF!	100	5	71.4	4	80	3	0.75	1
563	A	27	24.77	3	Primary infertility	IVF		1950	13	3.32	2.3	6.57	4.7	5020	0.5	16	9	#REF!	47.4	6	66.7	6	100	4	0.666667	2
507	E	21	24.01	1	Secondary infertility	IVF		1750	10	4.33	2	4.47	1.8	2126	0.6	10.1	9	#REF!	100	9	100	8	88.9	6	0.75	3		Yes	Yes
568	G	27	19.23	3	Primary infertility	IVF		3000	13	6.56	4.2	1.7	1.5	3769	1.1	13	9	#REF!	100	9	100	8	88.9	3	0.375	1		Yes	Yes
511	G	39	18.2	1	Secondary infertility	ICSI		2700	11	6.09	3.9	1.22	0.7	1784	1	11.7	8	#REF!	100	4	50	4	100	0	0	0
836	F	34	22.58	3	Secondary infertility	IVF		2250	10	9.3	4.1	2.26	2.7	807	0.4	10	9	#REF!	100	8	88.9	8	100	5	0.625	0		Yes	Yes
860	G	34	24.11	5	Secondary infertility	IVF		3000	14	6.55	2.4	4.51	0.4	4601	2.2	9.4	9	#REF!	64.3	8	88.9	8	100	6	0.75	2
26	C	32	27.87	5	Secondary infertility	IVF		2000	10	6.3	2.1	1.63	2.9	1419	1	11	7	#REF!	100	7	100	7	100	7	1	5
29	G	24	28.72	3	Primary infertility	IVF		1350	9	5.45	5.1	5.1	1.3	1585	0.3	7.7	9	#REF!	100	5	55.6	5	100	4	0.8	1
869	G	25	30.12	1	Secondary infertility	IVF		3300	12	6	7.2	3.59	3.5	2106	0.4	11	9	#REF!	100	8	88.9	6	75	5	0.833333	0
31	E	38	23.83	1	Primary infertility	ICSI		1800	8	4.82	2.6	1.9	2.2	1595	0.7	9.9	8	#REF!	100	6	75	6	100	3	0.5	1
33	D	27	22.48	5	Primary infertility	IVF		3075	11	3.31	0.8	1.49	0.9	759	0.3	13	6	#REF!	100	5	83.3	5	100	5	1	3
36	F	31	17.45	2	Primary infertility	ICSI		2475	11	6.18	4	4.77	2	5630	1	10	8	#REF!	100	2	50	2	100	1	0.5	0
37	D	36	22.43	10	Primary infertility	IVF		3300	12	4.7	0.9	1.62	0.9	2474	1.9	9.3	6	#REF!	75	6	100	6	100	1	0.166667	0
889	F	29	22.58	2	Secondary infertility	IVF		1500	11	4.87	7.4	8.43	3.9	1858	0.5	12.5	9	#REF!	100	9	100	8	88.9	6	0.75	1
43	C	33	21.91	3	Secondary infertility	IVF		2250	10	7	1.1	1.43	1.5	1628	0.4	11.5	6	#REF!	100	5	83.3	5	100	3	0.6	1
11	F	28	22.31	1	Secondary infertility	IVF		1325	10	5.59	6.2	6.88	3.4	1646	0.4	17	9	#REF!	90	9	100	9	100	5	0.555556	3
46	C	34	32.05	1	Primary infertility	IVF		2025	9	6.97	3.5	1.22	4.7	983	0.5	11.7	2	#REF!	100	0	0	0	0	0	0	0
131	G	26	22.5	4	Primary infertility	ICSI		1500	10	4.04	2.6	3.82	0.5	1112	0.2	13	9	#REF!	100	9	100	9	100	7	0.777778	0
55	D	35	23.01	7	Secondary infertility	IVF		3600	13	6.29	1.9	1.25	2.3	1747	1	11	2	#REF!	66.7	2	100	1	50	1	1	0
447	D	26	22.21	3	Secondary infertility	IVF		1800	8	5.57	1.9	5.01	2.1	1377	0.8	11	9	#REF!	100	5	55.6	5	100	5	1	3		Yes	Yes
59	G	35	18.08	5	Primary infertility	ICSI		2175	8	10.19	4.8	2.33	1.4	1027	0.6	10.4	2	#REF!	100	2	100	1	50	0	0	0
484	E	41	25.39	20	Primary infertility	IVF		1800	8	5.35	3.1	3.08	2.8	2121	0.6	10	9	#REF!	100	9	100	8	88.9	5	0.625	3
63	D	36	24.03	11	Primary infertility	IVF		2250	9	5.03	0.9	1.62	1.1	1138	0.81	8.8	7	#REF!	100	4	57.1	4	100	2	0.5	0
65	E	31	23.23	2	Primary infertility	IVF		2150	10	9.18	3.8	2.06	3.3	943	0.43	9.8	7	#REF!	100	7	100	7	100	7	1	3
22	G	35	20.43	11	Secondary infertility	IVF		2400	13	6.47	4.9	6.08	1.7	1620	0.7	13.4	9	#REF!	100	9	100	8	88.9	6	0.75	4		Yes	Yes
77	F	35	23.94	6	Secondary infertility	ICSI		2250	10	7.57	3	5.36	1.9	2824	0.68	10.4	9	#REF!	100	7	100	6	85.7	4	0.666667	0
92	G	28	19.49	2	Primary infertility	IVF		1350	9	7.34	3.9	2.81	1.1	1697	0.49	11.9	9	#REF!	100	8	88.9	8	100	4	0.5	2
149	G	26	20.13	2	Secondary infertility	IVF		1950	9	5.17	2.1	2.69	0.8	2218	0.74	11.1	9	#REF!	100	8	88.9	8	100	7	0.875	5		Yes	Yes
85	C	26	20.2	2	Primary infertility	IVF		1725	8	5.52	2.8	2.73	3.5	2052	0.56	13	9	#REF!	100	9	100	9	100	5	0.555556	1
117	F	37	22.21	2	Secondary infertility	IVF		2325	10	8.02	3.2	2.69	2.3	2877	0.7	11.7	9	#REF!	100	7	77.8	7	100	6	0.857143	2		Yes	Yes
332	D	34	23.34	1	Primary infertility	IVF		3300	10	5.39	1.5	1.95	1.5	3983	1	12	9	#REF!	100	7	77.8	7	100	4	0.571429	2		Yes	Yes
165	D	36	20.43	8	Primary infertility	IVF		3150	14	0.45	0.1	4.76	0.1	1305	0.4	11.5	9	#REF!	100	9	100	9	100	8	0.888889	2		Yes	Yes
648	G	36	21.23	1	Secondary infertility	ICSI		2100	10	8.84	2.93	2.49	1.05	1485	0.8	8.6	9	#REF!	100	6	66.7	6	100	6	1	1		Yes	Yes
113	D	30	21.57	5	Secondary infertility	IVF		2050	10	9.75	4.4	1.91	5.3	2241	0.73	13	7	#REF!	100	6	85.7	6	100	2	0.333333	0
116	B	37	31.25	10	Secondary infertility	IVF		3000	11	6.15	2.3	2.29	3.5	3154	1.14	11	9	#REF!	100	4	44.4	4	100	2	0.5	0
118	F	40	22.96	2	Primary infertility	IVF		1800	9	5.68	2.1	3.16	1.2	1151	1.45	9.4	5	#REF!	100	3	60	3	100	2	0.666667	1
121	A	35	25.22	7	Primary infertility	IVF		2000	10	5.88	1.4	1.38	8	1887	1.62	13	8	#REF!	100	7	87.5	7	100	5	0.714286	3
123	D	35	23.01	7	Secondary infertility	IVF		3450	10	7.66	2.4	1.25	2.4	650	0.6	12	2	#REF!	100	1	50	1	100	1	1	0
129	F	41	23.44	4	Secondary infertility	IVF		1800	8	6.12	4.7	1.72	2.5	1559	0.55	10.4	5	#REF!	83.3	3	60	3	100	3	1	2
145	F	38	19.14	2	Primary infertility	IVF		2700	10	7.47	4.6	3.68	2.5	2734	0.7	11	7	#REF!	100	5	71.4	5	100	3	0.6	0
152	E	42	22.04	1	Secondary infertility	IVF		2175	10	15.43	1.3	1.38	1	1115	0.71	9.7	9	#REF!	100	9	100	8	88.9	7	0.875	3
156	G	33	23.26	3	Secondary infertility	IVF		1800	7	4.32	2	2.68	0.7	564	0.36	9.3	4	#REF!	100	4	100	3	75	1	0.333333	0		Yes	Yes
161	E	40	22.31	3	Secondary infertility	IVF		2475	12	9.9	5.1	1.62	4.5	2710	0.83	12	9	#REF!	100	8	88.9	7	87.5	6	0.857143	2		Yes	Yes
178	F	38	27.53	2	Secondary infertility	IVF		2025	9	5.8	2.6	3.29	1.3	1298	0.4	10	6	#REF!	100	6	100	6	100	4	0.666667	3
179	B	29	17.26	1	Secondary infertility	IVF		2025	9	21.99	2.1	1.63	3.9	486	0.17	11	1	#REF!	100	1	100	1	100	1	1	0
180	G	39	23.52	2	Secondary infertility	ICSI		1875	8	5.34	3	1.72	0.7	1289	0.28	12	8	#REF!	100	6	75	6	100	1	0.166667	0
182	A	42	23.44	2	Secondary infertility	IVF		3200	12	4.12	2.4	2.85	5.2	2106	0.42	12.4	3	#REF!	100	1	33.3	1	100	0	0	0
190	F	38	24.03	1	Secondary infertility	ICSI		2075	10	5.48	2.3	1.91	1.4	1401	0.47	12	6	#REF!	85.7	4	80	3	75	3	1	2
193	D	29	20.89	1	Primary infertility	IVF		1050	7	4.57	1.5	5.85	1.6	4498	0.55	11	9	#REF!	75	8	88.9	8	100	3	0.375	3		Yes	Yes
199	G	37	20.31	6	Secondary infertility	IVF		2375	10	7.26	2.8	1.87	0.8	1823	0.57	9.9	5	#REF!	100	5	100	5	100	3	0.6	2		Yes	Yes
209	B	43	22.43	2	Secondary infertility	ICSI		4800	14	1.7	1.2	2.61	1.9	2929	0.68	11	6	#REF!	100	4	80	4	100	3	0.75	0
215	B	34	21.57	6	Primary infertility	IVF		1400	7	6.72	1.2	1.78	2	879	0.34	12	5	#REF!	83.3	4	80	4	100	3	0.75	1		Yes	Yes
217	E	38	19.53	5	Primary infertility	IVF		1875	9	3.72	1.3	1.7	1.1	2039	1.31	8.9	8	#REF!	100	6	75	5	83.3	5	1	1
224	G	25	25.15	3	Primary infertility	IVF		2475	11	5.99	2.5	1.61	0.9	885	0.24	11	4	#REF!	80	3	75	3	100	3	1	1		Yes
231	F	31	26.93	5	Primary infertility	IVF		2700	10	6.91	6	4.52	3.1	422	0.19	8	2	#REF!	100	1	50	1	100	1	1	0		Yes	Yes
237	D	35	30.02	1	Primary infertility	IVF		3375	13	4.1	1.4	1.61	1.4	1396	0.69	11	7	#REF!	87.5	5	71.4	5	100	0	0	0
243	G	28	20.32	5	Primary infertility	IVF		1500	8	7.42	5.3	3.9	1.2	3413	0.82	9	9	#REF!	100	8	88.9	8	100	2	0.25	0
246	G	31	21.08	1	Secondary infertility	IVF		1875	10	5.13	2.9	2.2	0.9	3521	0.7	7.4	2	#REF!	50	2	100	2	100	1	0.5	0
259	E	31	25.39	3	Secondary infertility	IVF		3950	12	8.4	2.1	1.4	1.9	1357	0.57	12	4	#REF!	66.7	4	100	4	100	0	0	0
268	F	27	24.03	1	Secondary infertility	ICSI		2450	10	4.54	2.7	1.83	1.4	3141	1.05	12	9	#REF!	100	9	100	9	100	7	0.777778	5
270	G	35	24.46	9	Primary infertility	IVF		2475	11	7.75	5.4	1.88	2.5	1475	0.3	12	6	#REF!	100	6	100	6	100	3	0.5	4
271	G	27	27.89	3	Primary infertility	IVF		2850	11	7.79	6.1	2.78	1	4156	1.31	13.7	9	#REF!	81.8	5	55.6	5	100	3	0.6	2
276	G	24	20.66	5	Primary infertility	IVF		1550	9	5.86	11.1	7.26	4	3532	0.97	8	8	#REF!	80	7	87.5	7	100	3	0.428571	1
285	F	30	23.05	2	Secondary infertility	IVF		3450	13	5.63	1.8	1.23	1.1	2278	0.53	16	7	#REF!	100	5	71.4	5	100	5	1	2
303	D	38	20.78	10	Primary infertility	ICSI		2925	11	7.16	4.3	3.66	5.2	1878	0.77	12.2	6	#REF!	100	3	100	3	100	0	0	0
305	F	30	24.98	1	Secondary infertility	IVF		2325	12	6.53	2.6	8.81	1.6	1425	0.3	10	7	#REF!	100	7	100	7	100	4	0.571429	3
306	A	29	25.71	9	Primary infertility	IVF		3200	14	6.55	1.4	4.18	3.3	3262	0.48	14.9	8	#REF!	80	6	75	5	83.3	4	0.8	2
327	F	39	29.22	3	Secondary infertility	IVF		1950	9	9.65	1.8	3.02	1.2	1536	0.24	10.2	4	#REF!	80	2	50	2	100	0	0	0
332	G	33	19.56	1	Primary infertility	ICSI		2025	9	7.6	5.1	1.89	1.1	2815	1.6	8.96	8	#REF!	88.9	5	100	4	80	3	0.75	1
340	E	42	21.12	2	Secondary infertility	IVF		2100	8	8.65	3.5	1.2	3.4	908	0.3	10	3	#REF!	100	1	33.3	1	100	0	0	0
343	G	31	21.63	5	Primary infertility	ICSI		1650	8	6.24	2.7	1.34	1	658	0.15	9.2	5	#REF!	83.3	4	100	4	100	2	0.5	0		Yes	Yes
361	F	39	21.09	12	Secondary infertility	IVF		2775	11	10.96	6.7	2.09	3.4	2885	1	13	9	#REF!	90	3	33.3	3	100	2	0.666667	0		Yes	Yes
372	G	31	20.2	7	Primary infertility	IVF		2025	9	9.58	8.8	4.2	2.2	1952	1.34	14	7	#REF!	100	6	85.7	5	83.3	4	0.8	1		Yes	Yes
14	G	31	26.27	3	Secondary infertility	IVF		1200	5	6.87	5.1	6.38	1.2	4057	1.21	8.3	8	#REF!	72.7	8	100	8	100	5	0.625	2		Yes	Yes
15	F	28	19.53	10	Primary infertility	IVF		2250	10	8.89	5.3	2.85	3.6	1282	0.52	12	6	#REF!	100	6	100	6	100	4	0.666667	1		Yes	Yes
18	G	33	21.63	1	Secondary infertility	IVF		1825	9	7.77	5	2.42	2.3	2687	0.57	11.8	8	#REF!	100	8	100	8	100	5	0.625	2
35	F	41	21.48	1	Secondary infertility	IVF		1575	7	9.69	2.5	3.91	1.6	722	0.2	10.4	6	#REF!	100	5	83.3	5	100	3	0.6	0
36	B	34	26.91	1	Secondary infertility	IVF		3150	11	5.74	1.4	2.71	2.4	2160	0.6	12.1	9	#REF!	100	9	100	9	100	7	0.777778	2
38	C	30	18.82	1	Primary infertility	ICSI		1850	9	9.72	3.5	4.84	4.8	1454	0.8	11.2	4	#REF!	100	2	66.7	2	100	2	1	0
39	D	31	22.68	6	Primary infertility	ICSI		2250	10	8.34	3.5	1.5	4.1	1538	0.56	10.8	5	#REF!	100	4	100	4	100	4	1	1
46	F	41	20.13	1	Secondary infertility	IVF		3075	10	6.67	4.3	1.77	3.2	3881	0.74	8.5	7	#REF!	100	7	100	7	100	6	0.857143	3
56	G	39	19.56	1	Secondary infertility	ICSI		2100	9	7.73	7.7	5.7	2.4	3280	0.41	11.3	9	#REF!	100	8	88.9	8	100	8	1	3		Yes	Yes
81	G	32	24.46	2	Secondary infertility	IVF		2600	10	7.31	3.5	2.69	1	2022	0.61	10	8	#REF!	100	5	62.5	5	100	3	0.6	1
89	F	38	31.25	11	Secondary infertility	IVF		3300	11	7.4	3.4	1.41	2.5	1150	0.34	12.3	5	#REF!	83.3	4	80	4	100	1	0.25	2		Yes	Yes
96	G	37	18.6	7	Secondary infertility	IVF		2250	10	9.32	9.6	1.3	3	1745	0.38	11	7	#REF!	100	7	100	7	100	4	0.571429	2
100	G	37	23.44	5	Secondary infertility	ICSI		2975	11	6.71	3.5	1.88	1.6	2752	0.39	8	4	#REF!	100	1	100	1	100	1	1	0
101	E	40	21.09	3	Secondary infertility	IVF		3150	11	8.02	3.4	1.63	2.8	2414	0.36	13	7	#REF!	100	5	71.4	5	100	4	0.8	1
103	D	42	27.39	4	Secondary infertility	IVF		6075	20	5.61	1.8	4.05	2	1535	0.39	13.6	6	#REF!	100	5	83.3	4	80	1	0.25	0
106	F	33	16.42	3	Secondary infertility	ICSI		1200	8	6.82	2.8	1.64	1.5	789	0.24	9.2	3	#REF!	100	1	100	1	100	1	1	0		Yes	Yes
107	B	45	22.27	3	Secondary infertility	ICSI		2625	8	6.08	2.2	3.47	4.3	2105	0.48	11	8	#REF!	100	5	100	5	100	1	0.2	0
109	G	43	23.07	1	Secondary infertility	IVF		1800	8	6.69	4.6	4.11	1	2152	0.3	8.5	9	#REF!	100	9	100	8	88.9	4	0.5	1		Yes
121	G	37	28.13	3	Secondary infertility	IVF		3000	10	6.39	3.1	2.2	1.5	1282	0.48	11.3	6	#REF!	85.7	6	100	5	83.3	1	0.2	0
124	F	25	15.57	1	Primary infertility	ICSI		1650	10	9.73	4.3	3.18	2.4	817	0.44	12.3	6	#REF!	100	4	66.7	3	75	1	0.333333	0
131	F	31	26.95	9	Primary infertility	ICSI		2850	11	6.11	2.6	1.55	1.4	1322	0.49	10.3	9	#REF!	100	2	100	2	100	2	1	0
134	E	39	21.85	3	Secondary infertility	IVF		1650	8	8.31	2.8	1.98	2.2	753	0.2	14.2	1	#REF!	25	1	100	1	100	0	0	0
143	F	43	20.12	14	Secondary infertility	IVF		2100	9	12.95	2.2	1.32	1.1	815	0.3	8	5	#REF!	83.3	5	100	4	80	2	0.5	0
146	G	34	19.15	4	Secondary infertility	ICSI		2925	13	14.03	3.2	2.43	0.9	2773	1.33	13.6	8	#REF!	100	2	66.7	2	100	1	0.5	0		Yes	Yes
149	G	30	26.84	1	Secondary infertility	IVF		1200	8	5.24	2	4.19	0.8	1120	0.23	9	8	#REF!	100	4	50	4	100	1	0.25	0
152	F	43	22.67	18	Primary infertility	IVF		2700	10	6.79	2.9	1.39	2.1	1510	0.45	9.3	7	#REF!	100	5	71.4	5	100	3	0.6	1
163	G	37	23.83	5	Secondary infertility	ICSI		2400	8	5.65	3.6	2.98	1	872	0.1	8.8	2	#REF!	50	0	0	0	0	0	0	0
167	G	30	28.72	6	Primary infertility	ICSI		1950	9	6.92	2.5	5.79	1.2	715	0.17	9.3	8	#REF!	100	5	83.3	5	100	1	0.2	0		Yes
170	E	40	25	10	Primary infertility	IVF		2250	9	6.3	2	2.06	1.5	1872	0.8	10.8	7	#REF!	100	6	85.7	6	100	5	0.833333	0
196	C	41	25.63	15	Secondary infertility	ICSI		1950	9	6.5	3.8	2.86	5.3	1503	0.39	9.6	8	#REF!	100	5	62.5	5	100	0	0	0
200	F	26	29.73	3	Secondary infertility	ICSI		1650	7	2.95	1.5	2.26	0.9	489	0.23	8.6	4	#REF!	80	2	50	2	100	2	1	0
201	E	31	21	1	Secondary infertility	IVF		2325	11	7.01	1.8	3.23	1.5	2799	0.6	11.1	9	#REF!	100	7	77.8	7	100	4	0.571429	3		Yes	Yes
210	F	36	25.33	1	Secondary infertility	IVF		2250	10	9.91	7.4	4.66	4.5	1324	0.27	8.2	5	#REF!	100	5	100	5	100	4	0.8	2		Yes	Yes
213	A	32	21.3	5	Secondary infertility	ICSI		1950	9	9.99	1.1	1.44	7	730	0.51	9.5	2	#REF!	100	2	100	2	100	1	0.5	0
225	D	28	20.5	5	Primary infertility	IVF		2750	11	6.59	2.3	2.46	2.7	1633	0.66	10.9	8	#REF!	100	5	62.5	4	80	1	0.25	0
231	G	36	21.48	1	Secondary infertility	IVF		1875	9	7.63	2.3	1.65	0.8	637	0.35	8.3	4	#REF!	100	4	100	4	100	3	0.75	0		Yes	Yes
247	G	33	21.63	4	Primary infertility	IVF		2550	12	10.7	3.5	2.52	0.6	844	0.2	11.5	7	#REF!	100	7	100	7	100	4	0.571429	4
249	F	39	22.31	10	Secondary infertility	IVF		1800	8	9.92	6.5	1.41	3.3	405	0.2	13.4	0	#REF!	0	0	0	0	0	0	0	0
251	F	32	28.93	1	Secondary infertility	IVF		2700	10	9.91	3.8	3.09	2.2	909	0.4	10.4	7	#REF!	100	6	85.7	6	100	3	0.5	1
259	D	40	21.09	3	Secondary infertility	IVF		3400	12	7.84	2.6	1.42	3	1340	0.48	11.5	6	#REF!	100	6	100	6	100	5	0.833333	2
261	E	34	20.32	6	Primary infertility	IVF		2325	9	7.05	4.4	1.75	3.7	958	0.34	11.5	4	#REF!	80	3	75	3	100	0	0	0
266	G	33	22.19	1	Primary infertility	ICSI		3600	13	10.31	4.4	1.31	0.2	722	0.56	10.8	3	#REF!	60	2	100	2	100	1	0.5	0
279	B	43	25.64	1	Secondary infertility	IVF		3000	10	5.31	1.1	1.31	2	1005	0.49	9	6	#REF!	100	4	66.7	4	100	1	0.25	0
280	F	29	17.94	2	Primary infertility	IVF		1425	8	7.16	3	2.7	1.7	1229	0.45	9.2	6	#REF!	100	5	83.3	5	100	2	0.4	2
283	C	31	23.12	2	Secondary infertility	IVF		2025	9	8.2	1.6	1.87	2.3	533	0.43	8.9	3	#REF!	100	1	33.3	1	100	1	1	0		Yes	Yes
284	F	41	28.58	1	Secondary infertility	IVF		4950	12	5.18	1.8	2.7	1.3	1572	0.67	11	9	#REF!	100	9	100	9	100	7	0.777778	5		Yes
300	G	33	23.22	5	Primary infertility	IVF		2400	10	6.88	3.5	1.67	0.9	1558	0.74	9.1	2	#REF!	66.7	2	100	2	100	2	1	0
305	E	40	26.64	1	Secondary infertility	IVF		2025	9	7.31	3.2	1.68	2.4	1190	0.41	9.8	4	#REF!	100	4	100	4	100	3	0.75	1
311	G	41	18.18	19	Primary infertility	IVF		3225	11	12.01	6.5	3.09	2.1	2966	0.35	12.7	5	#REF!	71.4	5	100	5	100	3	0.6	1
316	F	35	23.23	6	Secondary infertility	IVF		1800	7	9.06	4.6	1.73	2.4	814	0.23	11	1	#REF!	100	0	0	0	0	0	0	0
319	G	32	21.5	5	Secondary infertility	ICSI		2700	9	7.25	3.1	1.44	1.1	513	0.33	9	4	#REF!	100	2	66.7	2	100	1	0.5	0
327	F	34	24.61	3	Primary infertility	IVF		4425	14	5.45	4.8	2.32	2.6	3741	0.47	12.5	7	#REF!	100	7	100	6	85.7	1	0.166667	2		Yes
329	F	32	24.97	6	Primary infertility	ICSI		4050	15	9.27	2.5	1.7	1.6	2633	1.27	11	6	#REF!	100	2	50	2	100	2	1	0		Yes	Yes
330	G	32	25.71	5	Secondary infertility	IVF		3075	14	6.85	2.7	1.61	0.9	443	0.14	9.3	3	#REF!	100	2	66.7	2	100	2	1	0		Yes
333	G	30	23.12	3	Secondary infertility	IVF		2850	11	6.67	3.5	1.93	0.9	1115	0.37	11.1	7	#REF!	100	7	100	7	100	4	0.571429	0
346	F	35	20.2	2	Secondary infertility	ICSI		3300	11	5.74	3	2.12	2.2	2802	1.23	10.7	9	#REF!	100	7	100	7	100	6	0.857143	5
352	C	42	24.54	7	Secondary infertility	IVF		1950	8	5.67	2.3	3.27	3	748	0.45	11	4	#REF!	100	3	75	3	100	1	0.333333	0
356	E	37	28.62	11	Primary infertility	IVF		2250	10	6.57	1.8	1.22	1.4	1085	0.42	11.4	3	#REF!	60	3	100	3	100	1	0.333333	0
363	G	33	20.03	4	Secondary infertility	IVF		1725	7	8.93	2.7	2.86	1.1	488	0.29	11	4	#REF!	100	2	50	2	100	1	0.5	0		Yes
371	F	29	22.89	1	Secondary infertility	IVF		1775	9	5.89	1.5	3.42	1.1	2976	0.75	10	8	#REF!	100	6	75	6	100	4	0.666667	1
377	G	30	18.61	2	Secondary infertility	IVF		2025	11	9.43	4.9	4.02	2.2	1912	0.55	11.8	4	#REF!	66.7	2	50	2	100	0	0	0
382	B	39	20.57	3	Primary infertility	IVF		2175	7	2.67	0.7	2.68	1.3	431	0.18	8	2	#REF!	100	0	0	0	0	0	0	0
386	B	27	19.62	3	Secondary infertility	IVF		2625	11	6.01	2.2	2.19	4	859	0.24	12	3	#REF!	100	3	100	3	100	3	1	1		Yes	Yes
389	C	26	18.43	2	Primary infertility	ICSI		2925	13	9.34	4.9	4.86	7.1	4151	0.73	12	3	#REF!	42.9	1	50	1	100	0	0	0
391	G	28	21.3	2	Primary infertility	IVF		1875	12	5.56	6.1	8.83	1.3	3590	0.43	12	9	#REF!	100	7	77.8	7	100	5	0.714286	2		Yes	Yes
398	D	26	21.19	3	Secondary infertility	IVF		2625	10	12.35	1.1	3.69	1.2	898	0.42	12.9	7	#REF!	100	6	85.7	6	100	5	0.833333	3
403	A	43	25.64	1	Secondary infertility	IVF		2025	9	5.97	1.3	1.31	2.9	1045	0.41	10.5	4	#REF!	80	4	100	4	100	3	0.75	0
416	G	31	20.83	5	Primary infertility	IVF		2125	9	6.54	2.5	1.21	1.1	1032	0.32	10.5	4	#REF!	66.7	4	100	4	100	3	0.75	0		Yes	Yes
422	G	33	19.22	12	Secondary infertility	IVF		4800	13	12.58	7.2	2.63	2.6	3667	1.03	11.8	5	#REF!	100	5	100	5	100	4	0.8	1
423	E	40	19.47	2	Primary infertility	ICSI		3150	11	7.23	1.4	2.32	1.3	1087	0.4	8.2	5	#REF!	83.3	4	80	4	100	3	0.75	2		Yes	Yes
427	G	25	21.09	1	Primary infertility	IVF		4425	11	7.07	4.2	1.79	1.2	2574	0.6	12	6	#REF!	100	4	66.7	4	100	3	0.75	1
440	D	42	23.98	0	Secondary infertility	IVF		2400	8	1.95	0.9	3.27	1.1	527	0.25	10.9	4	#REF!	100	2	50	2	100	2	1	0
453	A	31	26.71	2	Secondary infertility	IVF		3525	12	4.96	2.6	1.24	7.6	579	0.32	10	4	#REF!	100	4	100	4	100	2	0.5	0
461	G	36	21.22	1	Secondary infertility	IVF		2250	9	5.38	3.9	1.95	1.2	1082	0.39	8.3	2	#REF!	33.3	1	50	1	100	1	1	0
471	A	40	20.17	4	Primary infertility	ICSI		3375	9	5.61	2.3	2.68	4.6	1741	0.6	10.2	3	#REF!	60	2	66.7	2	100	2	1	0
473	G	38	22.66	5	Secondary infertility	ICSI		2850	9	3.55	11.9	2.98	1.5	3320	0.52	10.2	4	#REF!	100	2	100	2	100	2	1	1
481	B	39	21.85	3	Secondary infertility	ICSI		1725	8	12.39	2.4	1.98	4.1	883	0.2	13.2	2	#REF!	50	0	0	0	0	0	0	0
485	G	31	19.53	9	Secondary infertility	IVF		1500	10	2.74	7.5	10.67	1.2	4077	0.81	10.3	9	#REF!	100	9	100	9	100	5	0.555556	0
486	G	39	17.53	10	Secondary infertility	IVF		2550	10	7.77	4.3	1.63	0.9	1620	0.76	10.4	6	#REF!	85.7	5	83.3	5	100	3	0.6	1
488	G	38	22.15	5	Primary infertility	IVF		2025	9	6.96	2.3	1.46	1	2281	0.27	14	5	#REF!	71.4	5	100	5	100	4	0.8	1		Yes	Yes
505	F	31	27.28	3	Primary infertility	IVF		2700	10	5.85	3.8	1.27	2.4	2934	0.71	13	8	#REF!	100	7	87.5	7	100	5	0.714286	3		Yes	Yes
514	A	27	25.48	0	Primary infertility	IVF		3525	11	6.71	1.8	2.23	3.7	615	0.46	10.6	1	#REF!	50	1	100	1	100	1	1	0
518	F	36	20.08	1	Secondary infertility	IVF		1950	8	9.86	2.6	1.44	1.6	1162	0.66	9.6	2	#REF!	40	1	50	1	100	0	0	0
526	G	38	26.04	11	Primary infertility	ICSI		2025	9	4.95	2.6	3.22	0.9	1542	0.67	13	6	#REF!	100	5	83.3	5	100	5	1	2
527	G	31	22.83	3	Primary infertility	ICSI		2025	9	6.56	3.1	2.03	1.3	1779	0.36	12.9	6	#REF!	100	3	60	3	100	3	1	1		Yes	Yes
541	F	33	20	6	Primary infertility	IVF		1950	9	4.95	1.9	2.68	1	3021	0.84	10.6	6	#REF!	75	3	50	2	66.7	1	0.5	0
548	F	34	21.33	3	Secondary infertility	IVF		2550	10	5.63	2.9	2.37	1.8	2594	0.75	10.2	7	#REF!	100	7	100	7	100	3	0.428571	1		Yes
551	G	33	22.58	4	Primary infertility	IVF		2350	10	4.36	2.6	3.22	0.8	2132	1.19	10.8	7	#REF!	100	4	57.1	4	100	3	0.75	0
567	E	34	22.6	2	Primary infertility	IVF		2675	10	6.41	2	1.68	1.7	2031	0.5	12.9	6	#REF!	100	6	100	6	100	5	0.833333	1
568	G	29	20.55	1	Primary infertility	IVF		3600	10	4.61	4.2	1.39	1.9	1671	0.6	10.5	5	#REF!	83.3	5	100	5	100	5	1	2
569	F	32	21.12	2	Primary infertility	ICSI		2400	10	6.41	1.9	1.22	1.2	1147	0.39	11	9	#REF!	100	5	83.3	4	80	4	1	2
583	G	38	23.71	2	Secondary infertility	ICSI		1575	7	7.86	6.1	1.46	1.7	774	0.38	9.9	6	#REF!	100	5	100	5	100	3	0.6	3
584	E	45	20.5	4	Secondary infertility	IVF		2850	10	5.5	2.6	2.41	2.5	4535	1.39	10.9	8	#REF!	100	8	100	7	87.5	4	0.571429	2		Yes
43	E	29	27.69	1	Secondary infertility	IVF		4800	14	1.77	1.7	1.88	1.3	2804	1.48	10	9	#REF!	100	8	88.9	8	100	3	0.375	1
47	D	29	20.31	1	Secondary infertility	IVF		2400	11	5.54	2.3	1.83	2.3	4629	1.17	11.6	7	#REF!	100	7	100	7	100	7	1	4
53	G	28	22.04	3	Primary infertility	IVF		3725	13	8.44	2.8	1.23	0.6	2270	0.65	13	9	#REF!	100	7	77.8	7	100	6	0.857143	2
55	B	37	23.8	17	Secondary infertility	IVF		3300	10	12.9	0.8	2.52	1.4	4291	1.98	13	9	#REF!	100	9	100	9	100	5	0.555556	3
62	G	28	22.43	1	Secondary infertility	IVF		2625	13	8.44	4.6	2.68	0.4	2467	1.63	6.8	8	#REF!	100	7	87.5	7	100	6	0.857143	3
63	F	34	25.39	1	Secondary infertility	IVF		2025	9	5.27	2.2	1.85	1.6	2489	0.91	6.3	9	#REF!	100	0	0	0	0	0	0	0
66	G	36	18.83	10	Primary infertility	IVF		2400	10	5.37	5.6	3.15	2.1	1515	1.45	8.2	6	#REF!	100	6	100	6	100	5	0.833333	2
67	G	34	20.83	5	Primary infertility	IVF		1800	6	10.22	4.3	2.39	1.2	785	0.2	13	1	#REF!	100	1	100	1	100	1	1	0
86	G	38	19.03	2	Secondary infertility	IVF		2250	10	5.42	3.3	1.61	1.2	2832	0.73	12.3	9	#REF!	100	9	100	9	100	7	0.777778	2
98	E	34	20.78	3	Secondary infertility	IVF		2925	11	8.91	3.7	1.93	3	2389	0.72	12.2	8	#REF!	100	8	100	8	100	4	0.5	2
106	D	34	23.31	10	Primary infertility	IVF		1875	9	6.3	1.6	7.37	1.8	1795	1.18	11.8	7	#REF!	100	7	100	7	100	5	0.714286	2		Yes	Yes
109	G	29	24.97	2	Secondary infertility	IVF		1800	11	4.31	3.2	12.36	1.3	1392	0.1	10	8	#REF!	100	7	87.5	7	100	5	0.714286	5		Yes	Yes
111	F	32	20.96	3	Primary infertility	IVF		1575	7	4.69	3.7	3.1	1.9	1095	0.3	9.8	4	#REF!	100	4	100	4	100	2	0.5	2		Yes	Yes
117	D	25	22.58	5	Primary infertility	IVF		1650	7	5.85	9.4	8.55	10.1	2756	0.88	9.3	6	#REF!	100	3	50	3	100	3	1	0
125	G	43	23.71	2	Primary infertility	ICSI		4425	13	12.36	2.9	1.72	0.8	1695	0.79	15	5	#REF!	71.4	1	20	1	100	1	1	0		Yes	Yes
131	G	29	19.03	8	Secondary infertility	ICSI		1575	7	5.85	3	1.39	1.4	1107	1.07	9.7	6	#REF!	100	4	66.7	4	100	3	0.75	1
135	F	35	22.77	6	Primary infertility	IVF		3350	11	6.81	3.2	1.5	2.3	1405	0.72	12	9	#REF!	100	9	100	9	100	3	0.333333	0
139	F	39	17.15	11	Secondary infertility	IVF		2475	8	7.04	3.9	1.63	2.3	738	0.52	11	2	#REF!	66.7	2	100	2	100	2	1	2
150	G	40	22.03	3	Secondary infertility	IVF		1800	8	7.6	5.8	1.51	1.5	868	0.36	12.6	9	#REF!	100	9	100	9	100	6	0.666667	3
161	F	36	18.97	4	Primary infertility	IVF		5775	14	15.93	7.1	2.33	3.9	2118	0.38	11	2	#REF!	66.7	2	100	2	100	1	0.5	0
162	F	33	21.09	3	Secondary infertility	IVF		1800	8	5.07	3.1	1.34	2	481	0.48	8.6	3	#REF!	100	2	66.7	2	100	1	0.5	0		Yes	Yes
169	D	38	22.94	10	Secondary infertility	IVF		3000	12	7.53	2.7	2.03	3.2	2781	1.35	10.5	8	#REF!	100	7	87.5	7	100	5	0.714286	3		Yes	Yes
171	D	41	21.99	1	Secondary infertility	IVF		2250	10	6.73	1.9	2.41	1.9	2194	0.71	9.4	7	#REF!	100	7	100	7	100	6	0.857143	5
180	G	27	24.03	5	Primary infertility	IVF		2925	12	6.39	2.6	2.36	0.5	3169	0.78	9.4	9	#REF!	100	8	88.9	8	100	6	0.75	4		Yes	Yes
185	A	38	21.64	1	Secondary infertility	ICSI		2250	10	3.56	1.2	1.53	4.1	2317	1.26	12.4	4	#REF!	80	3	100	3	100	1	0.333333	0
209	G	41	20.5	10	Primary infertility	IVF		1800	8	10.46	4.9	1.23	1.2	914	0.53	5.5	3	#REF!	100	2	66.7	2	100	1	0.5	1
211	G	38	20.2	3	Secondary infertility	IVF		2325	8	8.16	3.5	1.48	1.5	1308	0.63	8.8	9	#REF!	100	4	44.4	4	100	2	0.5	0		Yes
213	C	29	20.96	3	Primary infertility	IVF		2475	9	4.21	1.3	1.72	1.9	1311	0.74	10.7	4	#REF!	100	4	100	4	100	3	0.75	0		Yes	Yes
226	F	37	31.11	5	Secondary infertility	IVF		2475	10	5.3	2.2	2.98	1.5	480	0.37	9.5	3	#REF!	100	0	0	0	0	0	0	0
235	G	37	19.71	7	Primary infertility	IVF		2475	11	10.52	2.1	1.97	0.7	2093	1.05	9.6	7	#REF!	100	4	57.1	3	75	1	0.333333	0
239	G	34	20.96	2	Primary infertility	ICSI		2950	12	6.39	4.1	2.25	1.2	4783	1.15	14.3	9	#REF!	100	5	71.4	5	100	2	0.4	2
245	F	33	19.63	7	Primary infertility	IVF		3300	11	4.7	2.5	2.43	1.6	6365	1.73	10.5	9	#REF!	100	4	44.4	2	50	1	0.5	0
248	D	38	18.13	11	Secondary infertility	IVF		2700	9	8.58	4.6	2.25	5	1572	0.38	10.8	3	#REF!	100	3	100	3	100	1	0.333333	1
250	G	33	25.39	5	Primary infertility	ICSI		3000	10	7.25	4	3.78	1.5	1536	0.51	11.2	9	#REF!	100	7	77.8	7	100	6	0.857143	4
279	D	45	25.34	2	Secondary infertility	IVF		2700	9	7.61	2.1	2.87	2.1	1107	0.42	8.1	8	#REF!	100	8	100	8	100	6	0.75	3
298	F	29	20.7	3	Primary infertility	ICSI		2775	9	6.64	2.3	1.93	1.6	1877	0.61	12	5	#REF!	83.3	4	100	4	100	4	1	2
303	F	31	22.49	3	Primary infertility	IVF		2550	10	6.59	3.8	1.75	2.7	1209	0.26	13.9	5	#REF!	83.3	4	80	4	100	3	0.75	1		Yes	Yes
304	C	40	21.77	3	Secondary infertility	IVF		3375	10	5.62	2.2	2.74	2.9	1542	0.46	12	9	#REF!	100	3	33.3	2	66.7	1	0.5	0		Yes	Yes
323	E	32	18.37	1	Secondary infertility	IVF		1650	8	4.95	1.7	1.85	1.34	1150	0.45	10.3	7	#REF!	100	1	14.3	1	100	1	1	0
333	F	40	23.52	14	Secondary infertility	IVF		3450	12	7	4.8	6.99	2.8	1710	0.28	11.6	8	#REF!	100	5	62.5	5	100	1	0.2	0
335	G	37	24.97	1	Secondary infertility	IVF		2025	9	6.47	1.84	1.57	0.58	656	0.41	11.8	6	#REF!	85.7	6	100	5	83.3	1	0.2	0
348	C	31	20.94	2	Primary infertility	IVF		2150	10	12.89	1.25	3.15	1.8	2405	1.11	13.8	9	#REF!	100	7	77.8	7	100	5	0.714286	2
353	G	34	21.26	4	Primary infertility	ICSI		1325	9	6.74	4.98	2.14	1.74	2443	0.52	14.3	6	#REF!	75	4	80	4	100	3	0.75	0		Yes	Yes
358	F	42	18.44	4	Secondary infertility	IVF		3525	10	8.72	4.41	1.67	2.93	946	0.89	14	4	#REF!	80	4	100	4	100	2	0.5	0
359	D	33	18.73	9	Secondary infertility	IVF		2175	11	11.65	2.93	5.21	3.34	1501	0.4	9.7	8	#REF!	100	0	0	0	0	0	0	0
364	F	31	17.58	8	Secondary infertility	IVF		2850	11	6.58	1.84	1.31	1.33	1708	1.06	12.7	3	#REF!	75	3	100	3	100	2	0.666667	0		Yes
367	G	32	28.15	4	Secondary infertility	IVF		3525	11	7.58	5.22	1.4	1.96	2714	0.47	10	8	#REF!	100	8	100	8	100	8	1	4
369	A	39	18.17	8	Primary infertility	ICSI		2850	11	9.35	5.44	1.31	11.01	622	2.2	10	1	#REF!	100	1	100	1	100	1	1	0
373	G	34	24.89	1	Secondary infertility	ICSI		1725	10	5.92	4.63	3.04	1.04	1106	0.27	8.3	3	#REF!	100	2	66.7	2	100	2	1	0
383	G	26	19.63	1	Primary infertility	ICSI		1650	11	5.32	4.37	8.43	0.97	3074	2.05	9	9	#REF!	100	6	85.7	6	100	3	0.5	1
393	G	27	23.63	2	Secondary infertility	IVF		2700	12	3.79	2.59	4.62	0.57	1702	0.78	12.7	8	#REF!	100	7	87.5	7	100	4	0.571429	1		Yes
396	D	37	21.56	1	Primary infertility	ICSI		3350	10	8.61	2.68	1.2	2.75	1230	0.95	11	1	#REF!	20	0	0	0	0	0	0	0
401	F	32	25	3	Primary infertility	IVF		3575	12	4.47	1.8	1.69	0.93	1673	1.2	9.4	9	#REF!	100	5	55.6	5	100	4	0.8	2
403	G	32	20.93	4	Primary infertility	IVF		2775	12	6.5	3.13	1.71	1.05	2488	0.95	11.3	8	#REF!	100	5	62.5	5	100	1	0.2	1
404	G	28	20.7	1	Secondary infertility	IVF		2925	14	6.09	3.75	5.82	1.07	1371	0.47	12.4	6	#REF!	100	5	83.3	5	100	4	0.8	1		Yes	Yes
405	E	30	18.43	2	Secondary infertility	IVF		1900	8	6.25	2.49	1.39	2.23	1012	0.62	12.3	5	#REF!	100	4	80	4	100	2	0.5	0
406	F	27	23.03	2	Secondary infertility	ICSI		3450	12	4.17	1.81	3.36	0.91	1364	0.56	16.6	9	#REF!	100	4	50	4	100	3	0.75	1
413	D	27	30.04	7	Secondary infertility	ICSI		2025	9	6.17	2.71	3.92	2.9	1312	0.56	10.1	9	#REF!	100	7	77.8	7	100	3	0.428571	1
421	D	42	24.46	1	Primary infertility	IVF		2775	9	18.21	1.04	2.23	1.04	1161	0.4	13.5	7	#REF!	100	4	57.1	4	100	3	0.75	1
427	F	31	19.63	5	Primary infertility	IVF		2475	10	10.17	2.68	1.63	1.78	1672	0.71	11.5	6	#REF!	100	4	66.7	4	100	3	0.75	1		Yes	Yes
430	G	35	23.19	7	Secondary infertility	IVF		2250	10	11.73	4.44	2.01	1.03	2011	0.43	11	6	#REF!	100	5	83.3	5	100	4	0.8	2
440	F	28	18.93	1	Primary infertility	IVF		1925	11	6.12	5.25	6.7	3.14	2439	0.63	11.2	8	#REF!	100	7	87.5	7	100	7	1	3
444	B	38	21.36	1	Secondary infertility	IVF		2700	12	9.82	3.82	1.22	6.29	801	0.51	13.6	2	#REF!	66.7	2	100	2	100	2	1	1		Yes
447	G	38	22.81	1	Secondary infertility	IVF		1800	8	5.23	4	3.58	1.54	1904	0.82	12.5	4	#REF!	100	3	75	3	100	3	1	1		Yes
452	C	38	22.07	1	Secondary infertility	IVF		2025	9	5.4	3.45	4.12	5.11	4607	1.43	10.6	8	#REF!	100	7	87.5	7	100	6	0.857143	5
454	E	34	21.83	5	Primary infertility	IVF		2400	8	4.25	3.4	2.44	2.8	2314	1.1	10.8	6	#REF!	100	2	33.3	2	100	2	1	0
466	G	43	24.95	3	Secondary infertility	IVF		4275	14	8.65	6.24	2.02	2.34	2300	0.27	9.6	5	#REF!	100	4	80	4	100	3	0.75	0
470	G	29	22.46	3	Primary infertility	IVF		1875	11	4.18	1.84	4.79	0.54	2328	1.55	13.1	7	#REF!	100	5	71.4	5	100	3	0.6	1
475	G	32	28.04	2	Secondary infertility	IVF		2700	10	7.38	3.06	2.31	0.82	1041	0.31	9.4	9	#REF!	100	9	100	9	100	9	1	8
496	G	37	23.23	14	Primary infertility	IVF		2400	9	7.66	3.45	2.96	0.83	679	0.4	14	5	#REF!	100	4	80	4	100	4	1	1
499	G	32	17.75	3	Secondary infertility	IVF		2000	10	5.22	4.5	2.9	2.24	3321	1.6	11	7	#REF!	100	6	85.7	6	100	5	0.833333	3
500	F	42	22.27	1	Secondary infertility	IVF		2325	7	5.7	2.35	3.43	1.37	724	0.47	13	4	#REF!	80	3	75	3	100	3	1	1
510	F	41	22.35	8	Secondary infertility	IVF		3300	11	8.53	3.61	3.24	2.36	1919	0.47	13.4	9	#REF!	100	6	66.7	6	100	6	1	2
520	G	32	18.69	3	Primary infertility	ICSI		2275	11	15.43	1.09	1.93	0.34	3231	2.64	13	7	#REF!	100	5	83.3	5	100	3	0.6	1
521	C	26	22.96	2	Secondary infertility	IVF		2075	10	6.41	1.4	4.01	1.82	2119	0.22	12	6	#REF!	100	5	83.3	4	80	3	0.75	0		Yes	Yes
527	G	35	27.34	3	Secondary infertility	IVF		2625	10	5.68	3.47	12.84	1.14	4385	1.2	10	9	#REF!	100	7	77.8	7	100	5	0.714286	2
531	A	41	20.5	2	Primary infertility	IVF		2850	12	11.34	2.45	1.23	6.3	671	2.71	7	0	#REF!	0	0	0	0	0	0	0	0
532	G	32	24.03	0	Secondary infertility	IVF		2475	11	6.48	3.82	3.47	0.76	2243	0.46	13.5	8	#REF!	100	8	100	7	87.5	5	0.714286	4		Yes	Yes
536	B	26	21.22	1	Primary infertility	ICSI		1300	8	6.21	2.23	1.2	3.69	697	0.26	10.5	3	#REF!	60	3	100	3	100	3	1	1		Yes	Yes
541	G	38	18.75	4	Primary infertility	IVF		2250	10	5.9	4.21	2.92	0.99	1458	0.27	9.5	8	#REF!	100	7	87.5	7	100	3	0.428571	0
544	E	30	18.29	1	Secondary infertility	IVF		1500	10	6.48	3.22	6.48	3.12	1383	0.41	12	5	#REF!	100	3	60	3	100	2	0.666667	0
547	A	30	19.53	5	Primary infertility	IVF		2250	10	8.51	3.22	1.45	10.63	579	0.22	12	0	#REF!	0	0	0	0	0	0	0	0
550	E	40	28.19	3	Primary infertility	ICSI		2025	9	6.72	2.34	1.46	2.26	792	0.53	15.2	4	#REF!	100	4	100	3	75	0	0	0
556	E	28	24.51	3	Primary infertility	ICSI		2325	9	4.98	1.66	2.58	1.26	1139	0.7	11	8	#REF!	100	7	100	7	100	4	0.571429	1
564	G	30	21.3	2	Secondary infertility	IVF		2325	9	6.39	4.81	7.72	1.44	855	0.46	9	3	#REF!	100	3	100	3	100	3	1	0		Yes
575	B	37	25.71	4	Secondary infertility	IVF		6600	16	3.52	1.43	1.69	2.29	400	0.44	13.2	2	#REF!	100	2	100	2	100	0	0	0
604	E	30	19.92	3	Primary infertility	IVF		4425	12	7.44	2.15	1.24	2	4054	1.29	10.7	9	#REF!	100	8	88.9	8	100	6	0.75	2		Yes	Yes
636	F	34	28.59	6	Primary infertility	ICSI		1800	8	4.86	1.86	2.65	0.97	728	0.53	10	6	#REF!	100	6	100	6	100	4	0.666667	2
640	E	33	19.05	3	Primary infertility	IVF		3275	11	9.51	2.02	1.26	1.57	644	1.05	8.1	6	#REF!	100	5	83.3	5	100	1	0.2	0
656	C	32	22.48	1	Primary infertility	IVF		2650	11	8.31	2.12	1.85	2.86	1605	0.68	13.1	9	#REF!	100	5	55.6	5	100	1	0.2	0
659	G	27	22.59	2	Primary infertility	ICSI		2700	12	6.13	3.34	2.46	1.59	2213	1.08	13	7	#REF!	100	0	0	0	0	0	0	0
661	A	24	26.37	1	Secondary infertility	ICSI		3000	11	8.02	1.74	1.86	4.64	2115	0.71	12	8	#REF!	100	3	100	3	100	3	1	0		Yes	Yes
664	G	36	20.28	7	Secondary infertility	IVF		3900	12	9.35	3.24	1.45	1.51	2256	0.7	14.4	9	#REF!	100	8	88.9	8	100	4	0.5	2
671	G	30	16.73	1	Secondary infertility	IVF		2325	9	7.72	2.93	2.66	0.52	2034	0.5	11	7	#REF!	100	6	85.7	5	83.3	1	0.2	0
674	E	43	24.95	3	Secondary infertility	IVF		2475	11	7.21	3.28	3.82	2.47	3026	0.81	10	8	#REF!	100	7	87.5	7	100	5	0.714286	1
675	F	35	22.04	4	Secondary infertility	IVF		2250	12	6.15	2.97	6.11	1.5	2268	0.68	12	9	#REF!	100	6	66.7	6	100	5	0.833333	2
680	E	38	23.44	9	Primary infertility	IVF		1400	8	5.78	4.03	6.25	3.95	2655	1.47	9	8	#REF!	80	8	100	8	100	6	0.75	1
685	F	36	23.71	3	Secondary infertility	IVF		2400	9	11.92	5.06	2	3.25	621	0.23	8.6	3	#REF!	100	3	100	3	100	2	0.666667	1
690	F	33	30.5	6	Primary infertility	IVF		3000	10	6.02	2.75	1.25	1.59	1225	0.61	9.2	8	#REF!	100	8	100	7	87.5	2	0.285714	2
694	G	39	21.48	3	Secondary infertility	IVF		3375	11	6.95	2.6	2.13	1.18	2427	1.89	11.8	9	#REF!	90	8	88.9	8	100	4	0.5	0
